# Supplementary material
Source: PubMed Central journal article supplement (PMC4207533)

# Structural Insights into Carbonic Anhydrase IX Isoform Specificity of Carbohydrate-Based Sulfamates

Janina Moeker, Brian P. Mahon, Laurent F. Bornaghi, Daniela Vullo, Claudiu T. Supuran, Robert McKenna and Sally-Ann Poulsen\*

\**Corresponding author.*

*S.-A.P. phone, +61 7 3735 7825; E-mail, [s.poulsen@griffith.edu.au](mailto:s.poulsen@griffith.edu.au).*

## Table of Contents

| <b>Material</b>                                                                                                              | <b>Pages</b> |
|------------------------------------------------------------------------------------------------------------------------------|--------------|
| $^1\text{H}$ and $^{13}\text{C}$ NMR spectra for compound <b>2f</b> , <b>2g</b> , <b>3a-3g</b> , <b>4a-4g</b> , <b>5b-5e</b> | S-2 to S-21  |

Compound **2f**

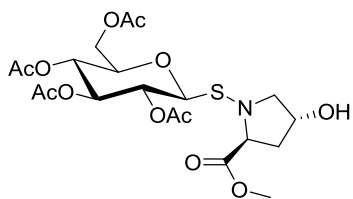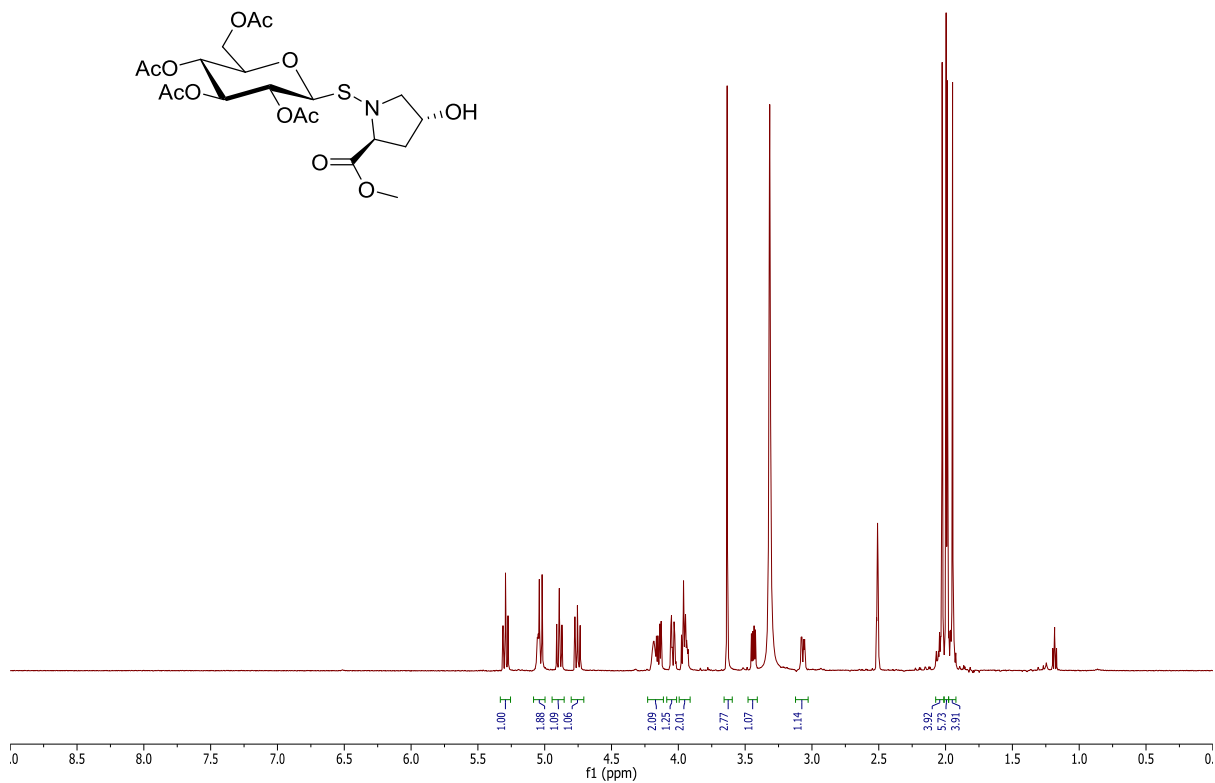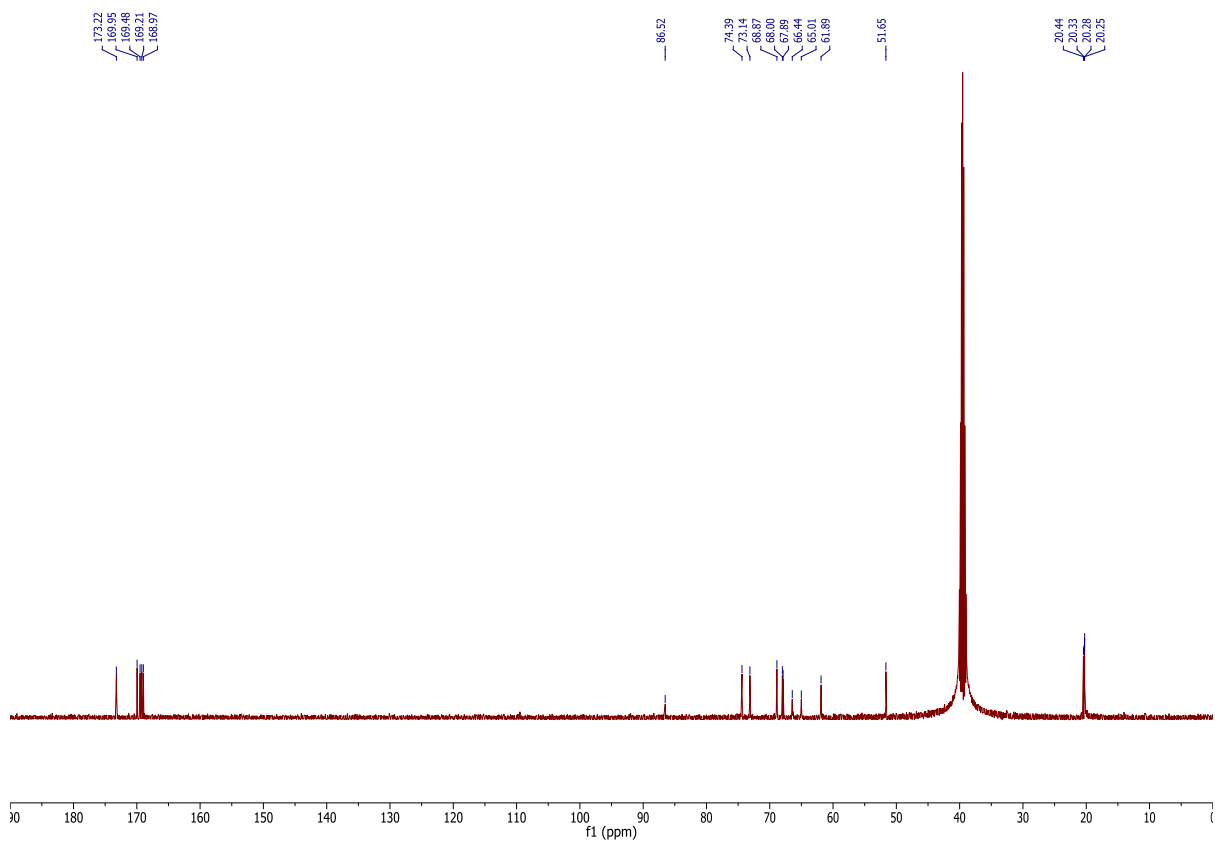

Compound **2g**

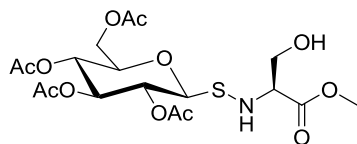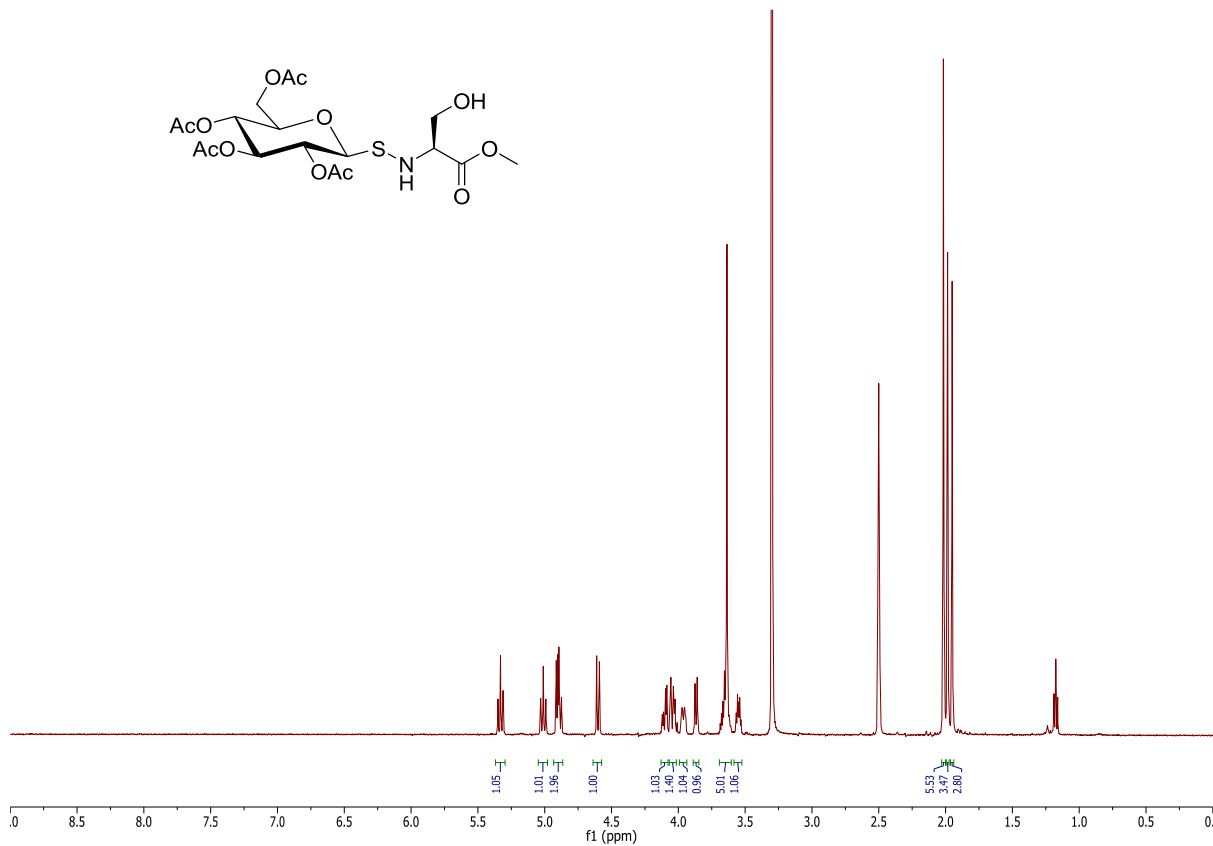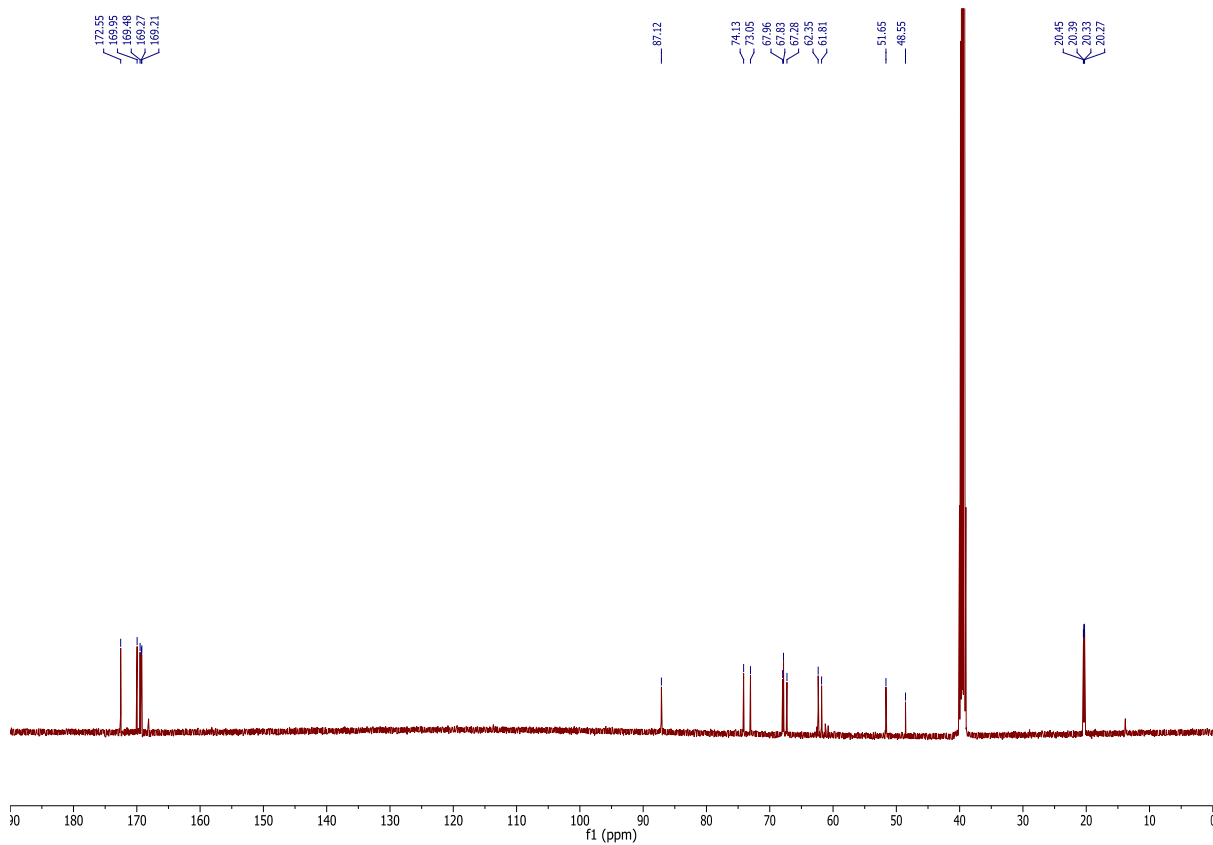

Compound **3a**

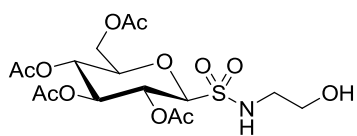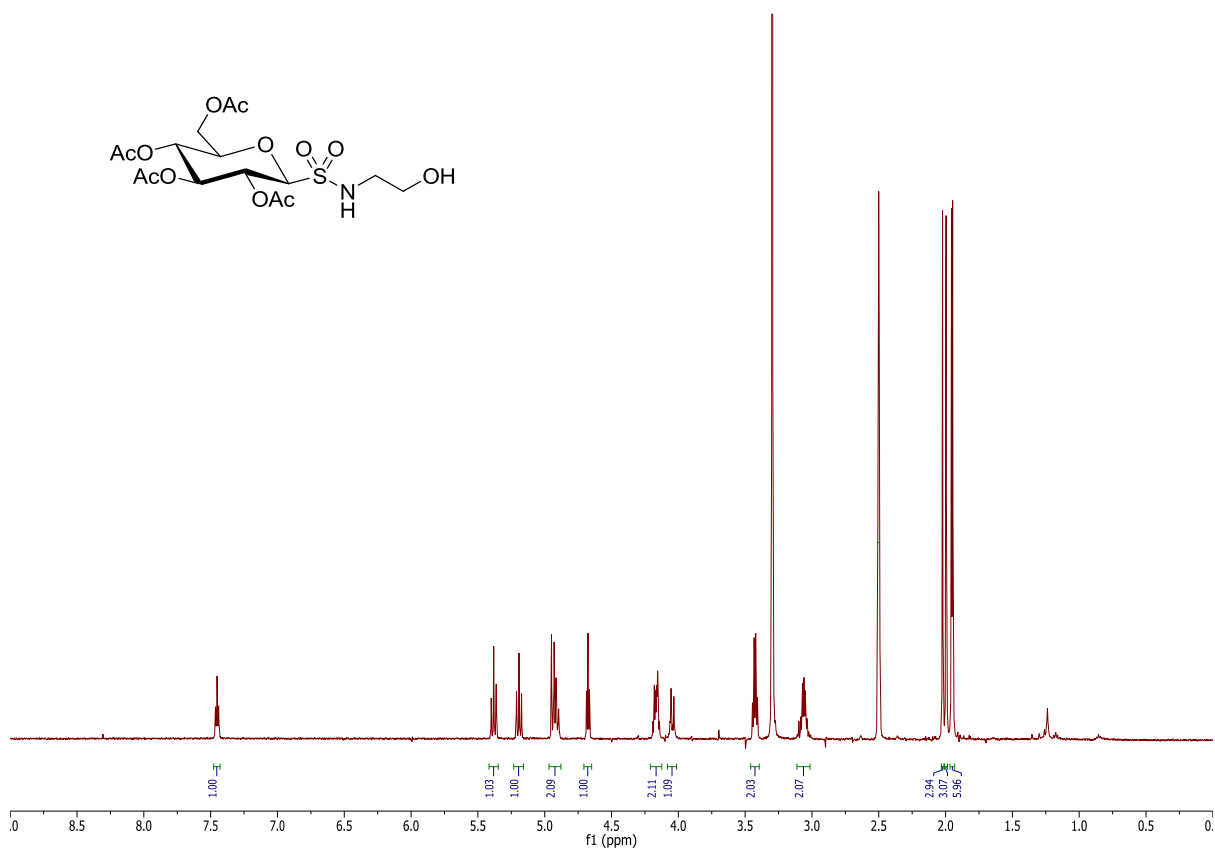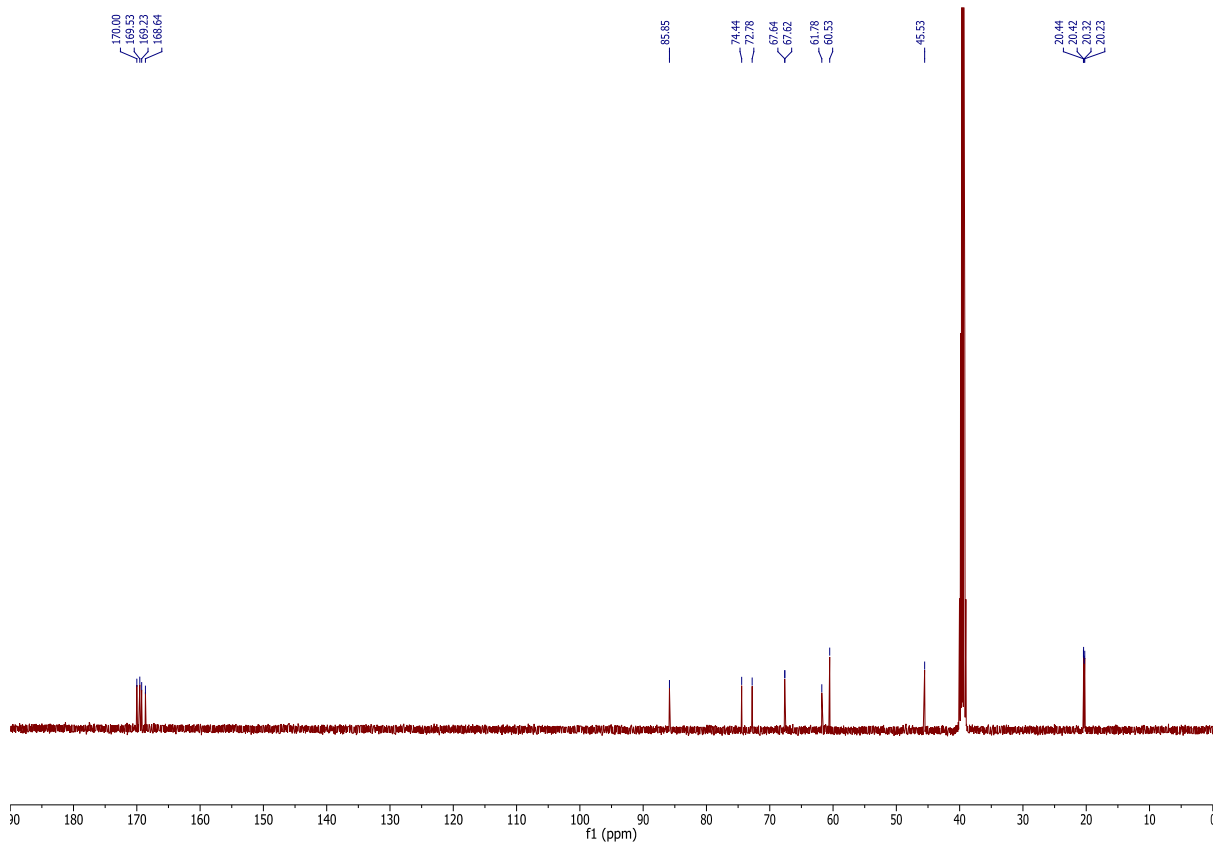

Compound **3b**

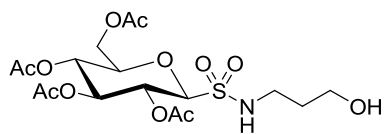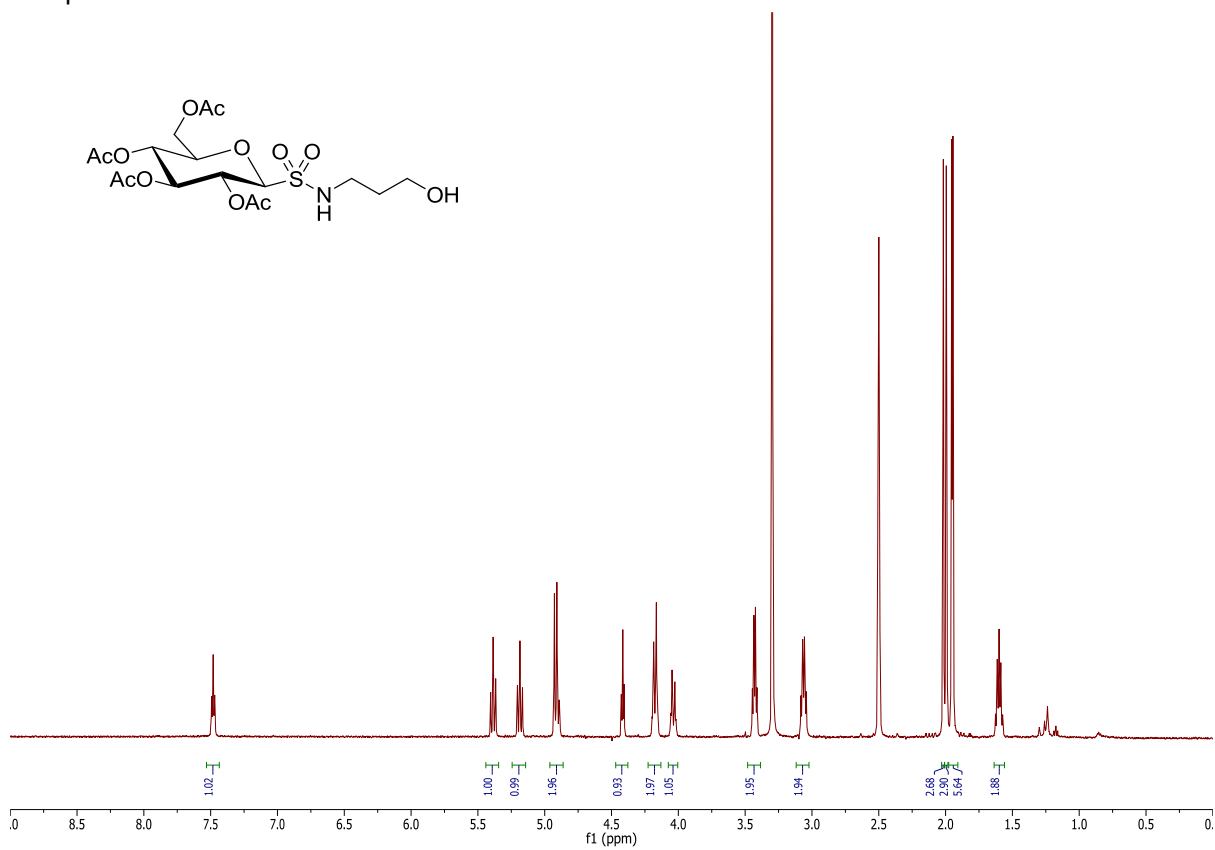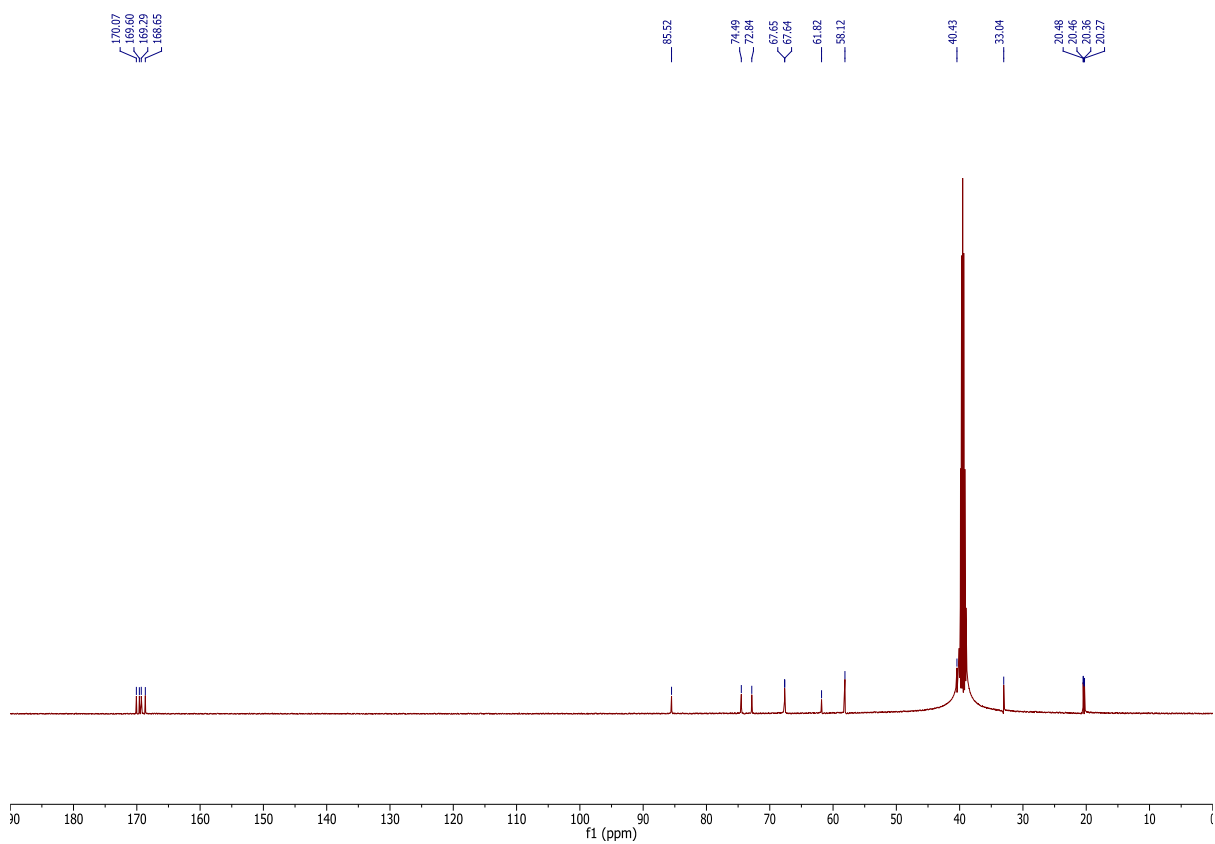

Compound **3c**

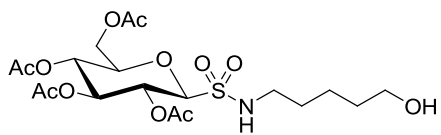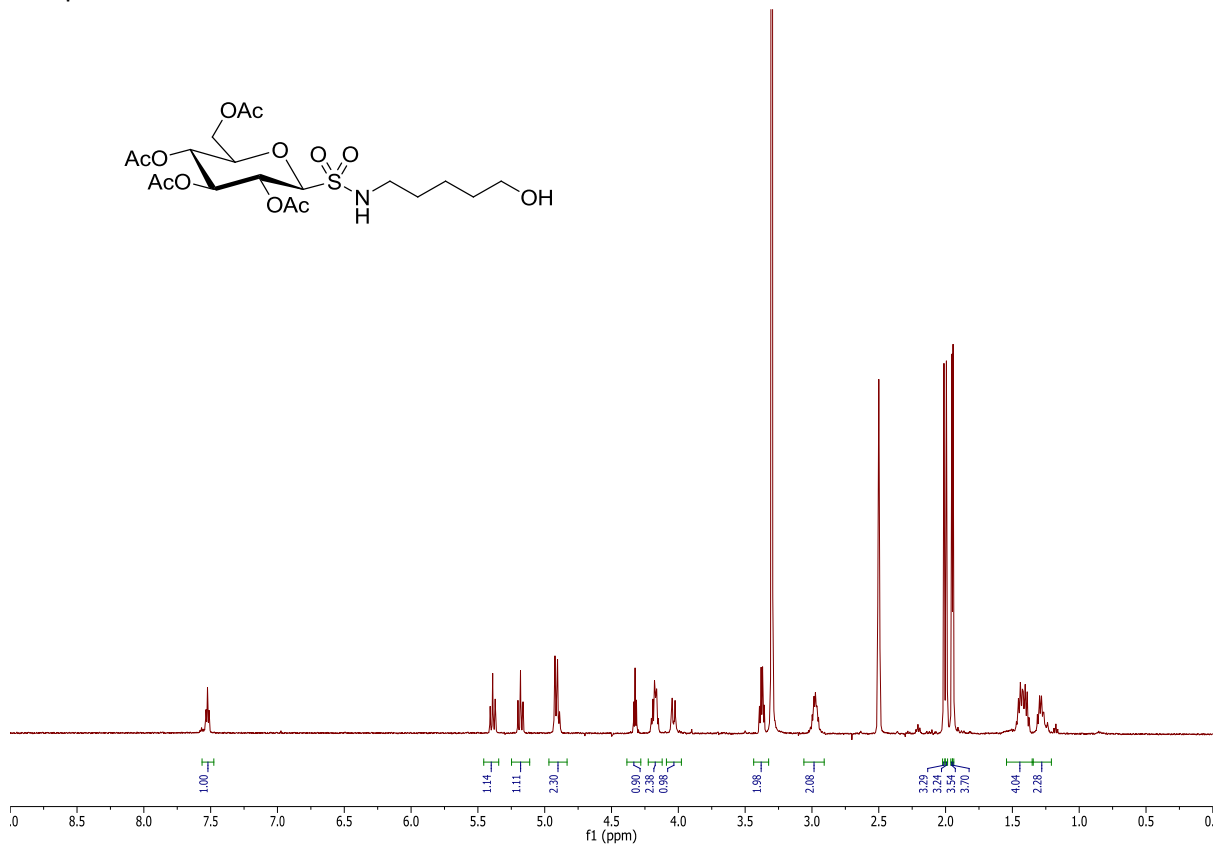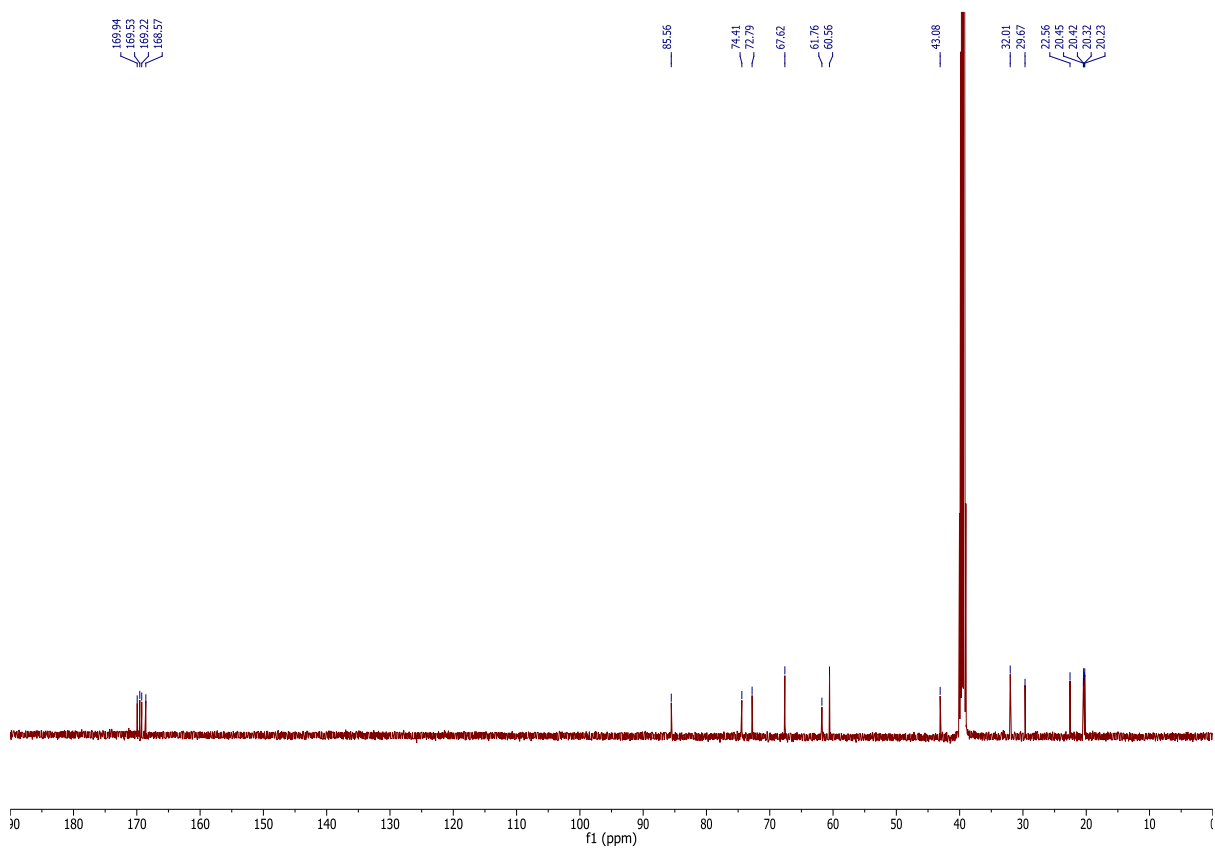

Compound **3d**

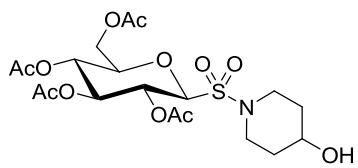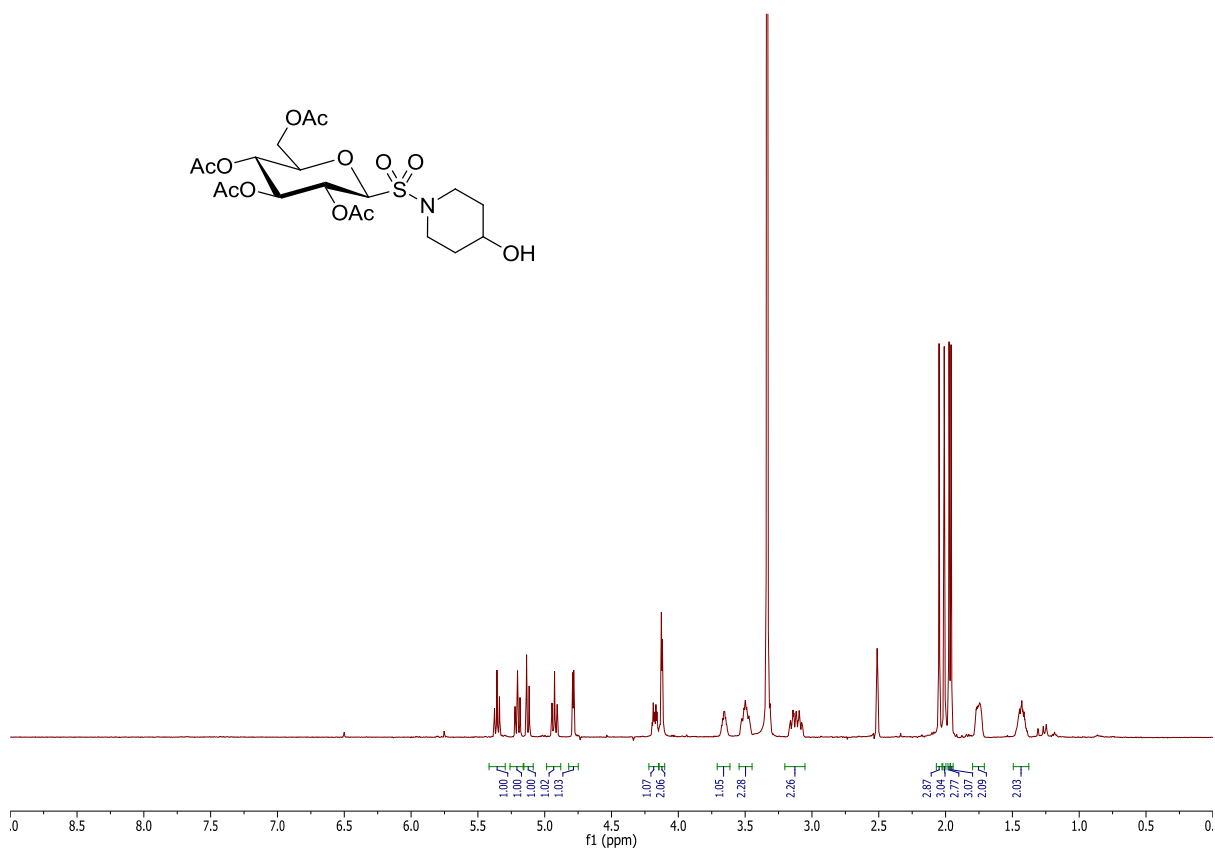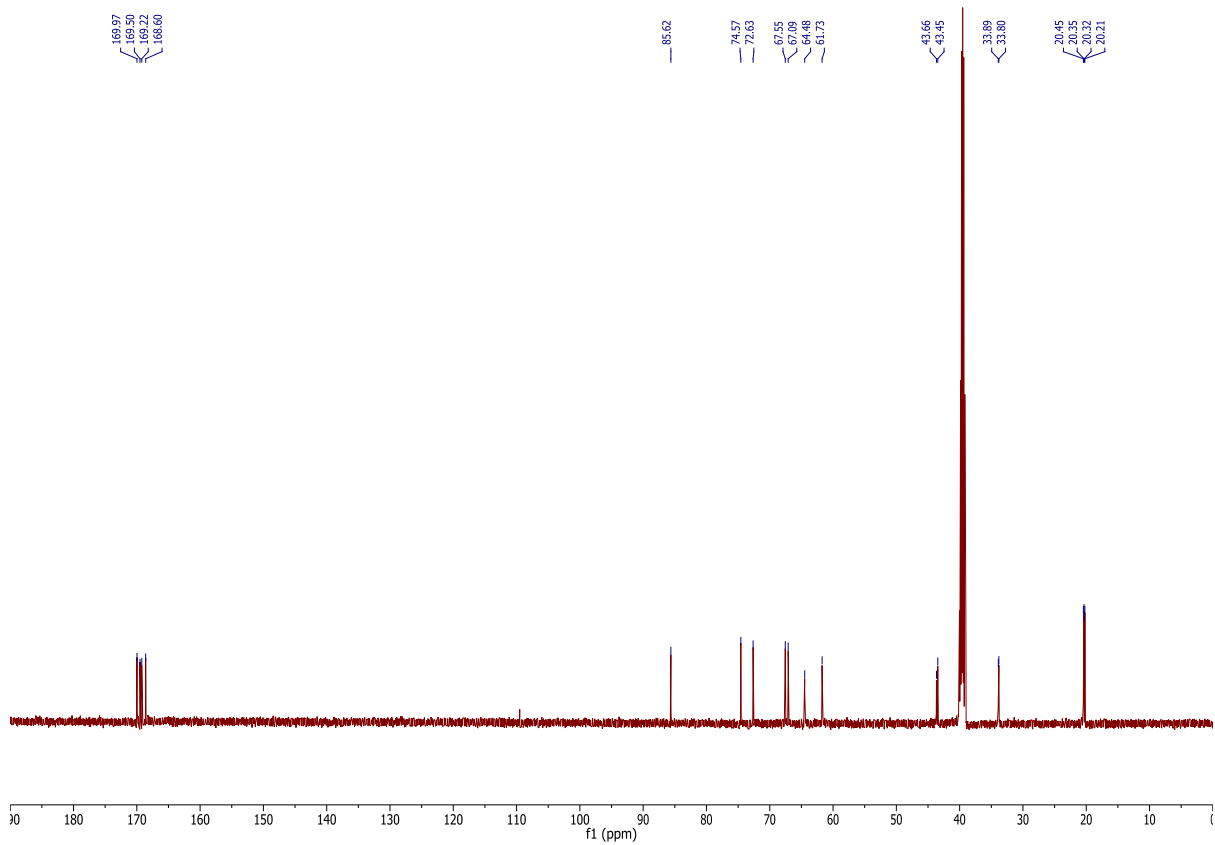

Compound **3e**

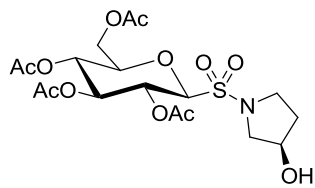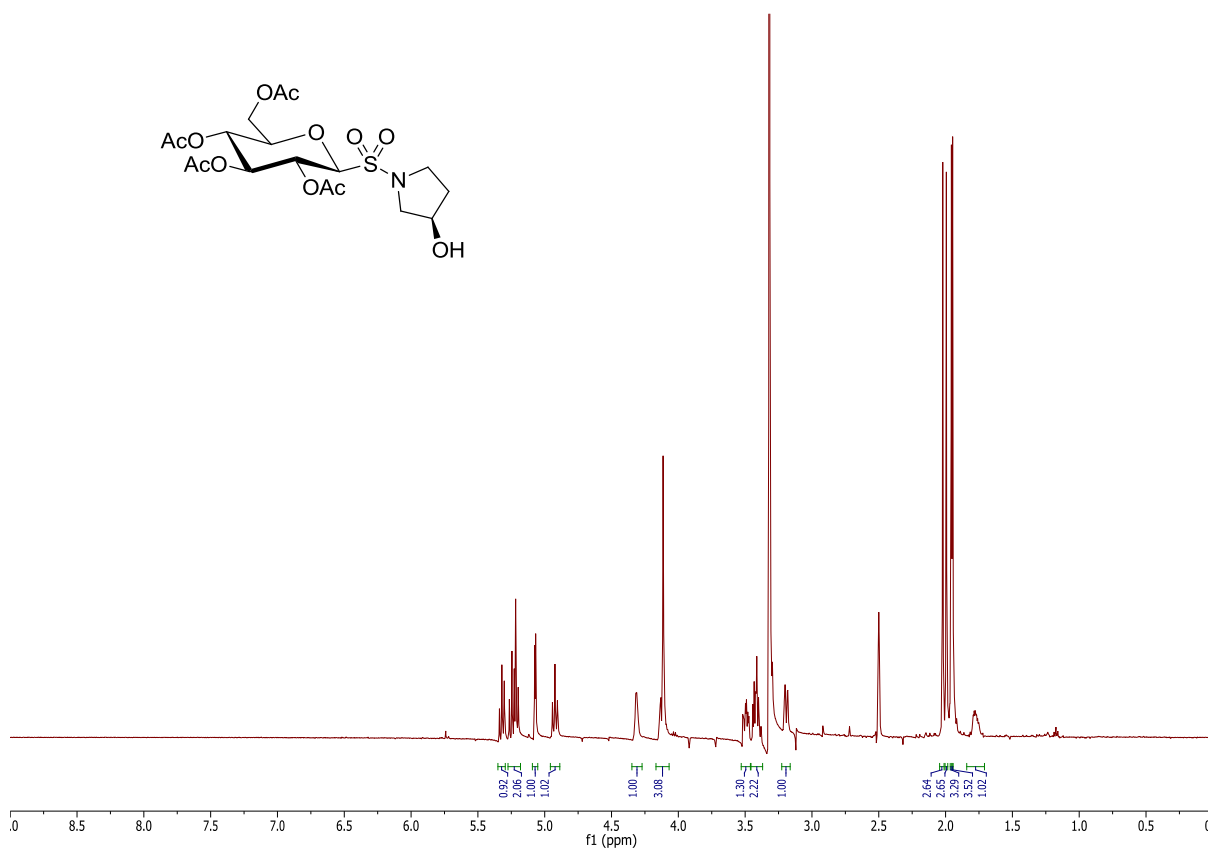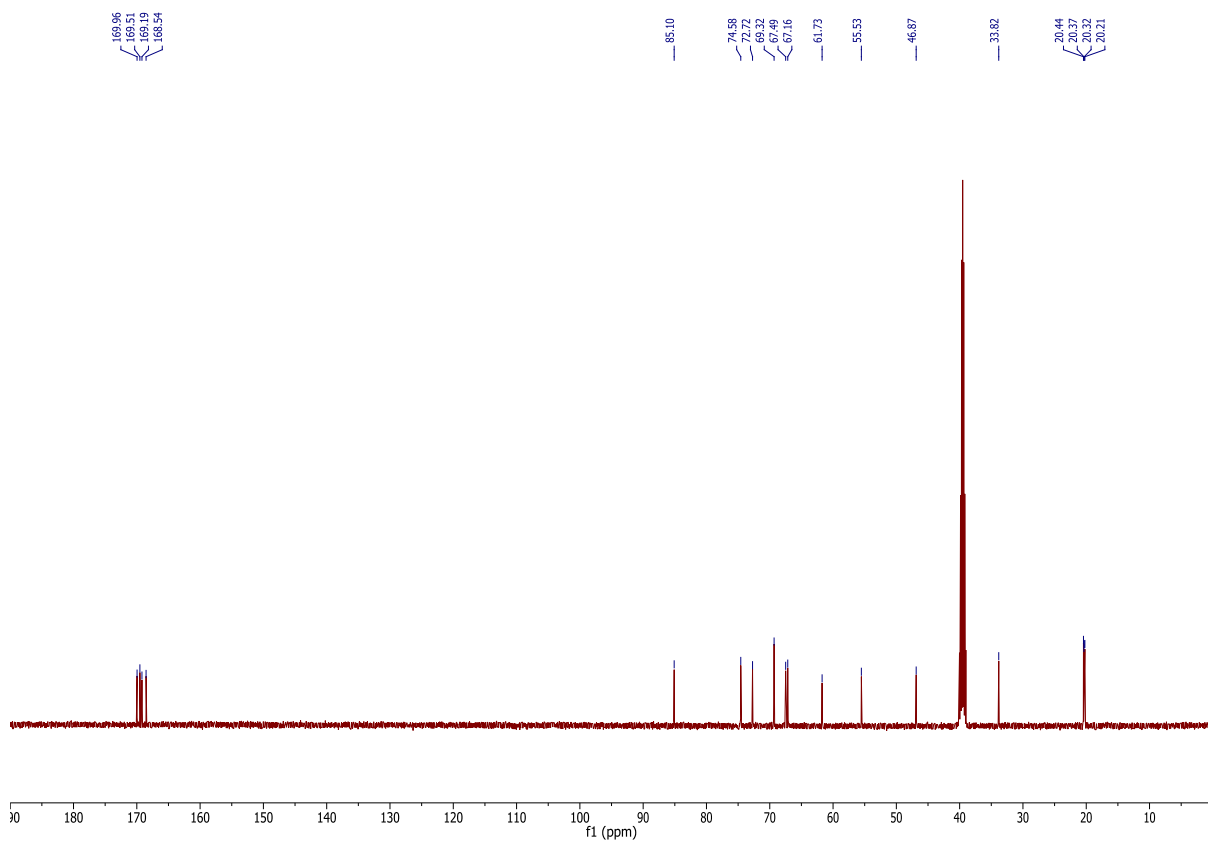



Compound **3f**

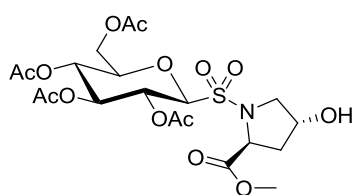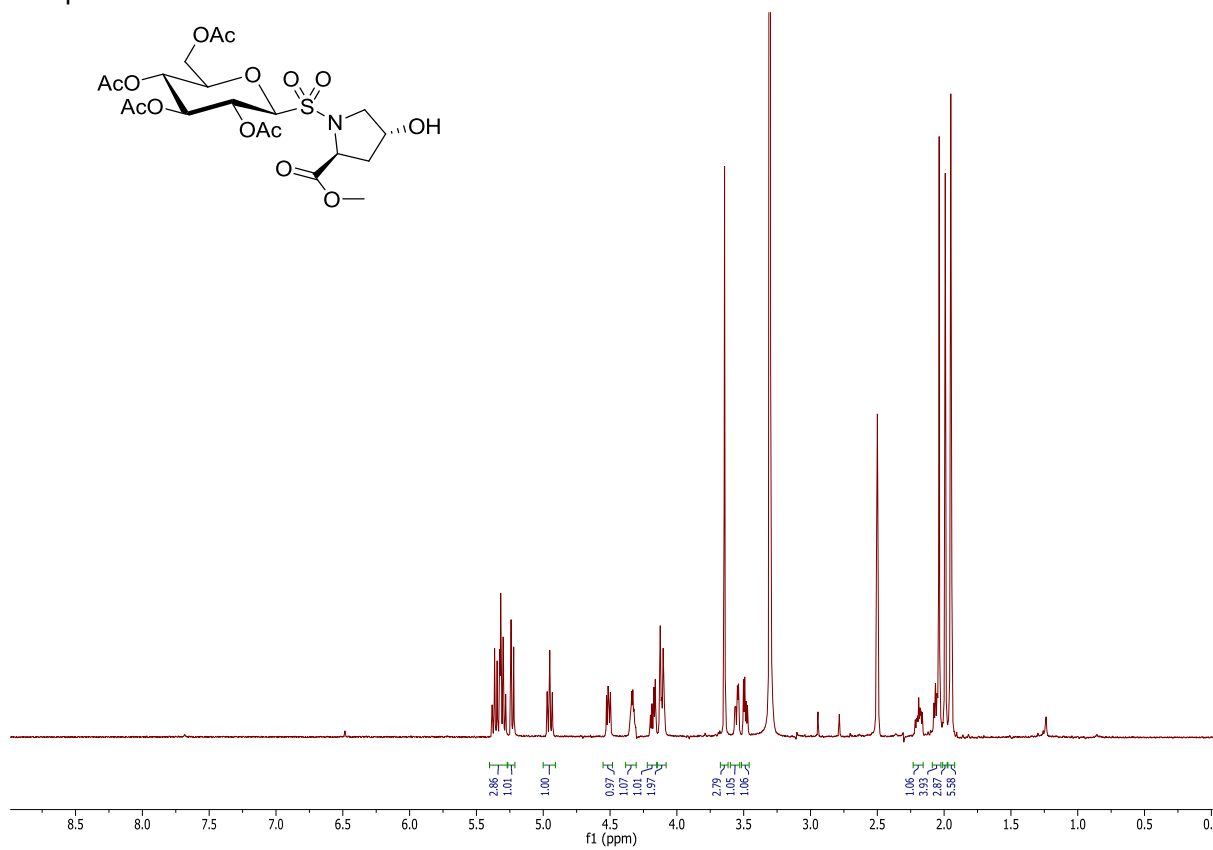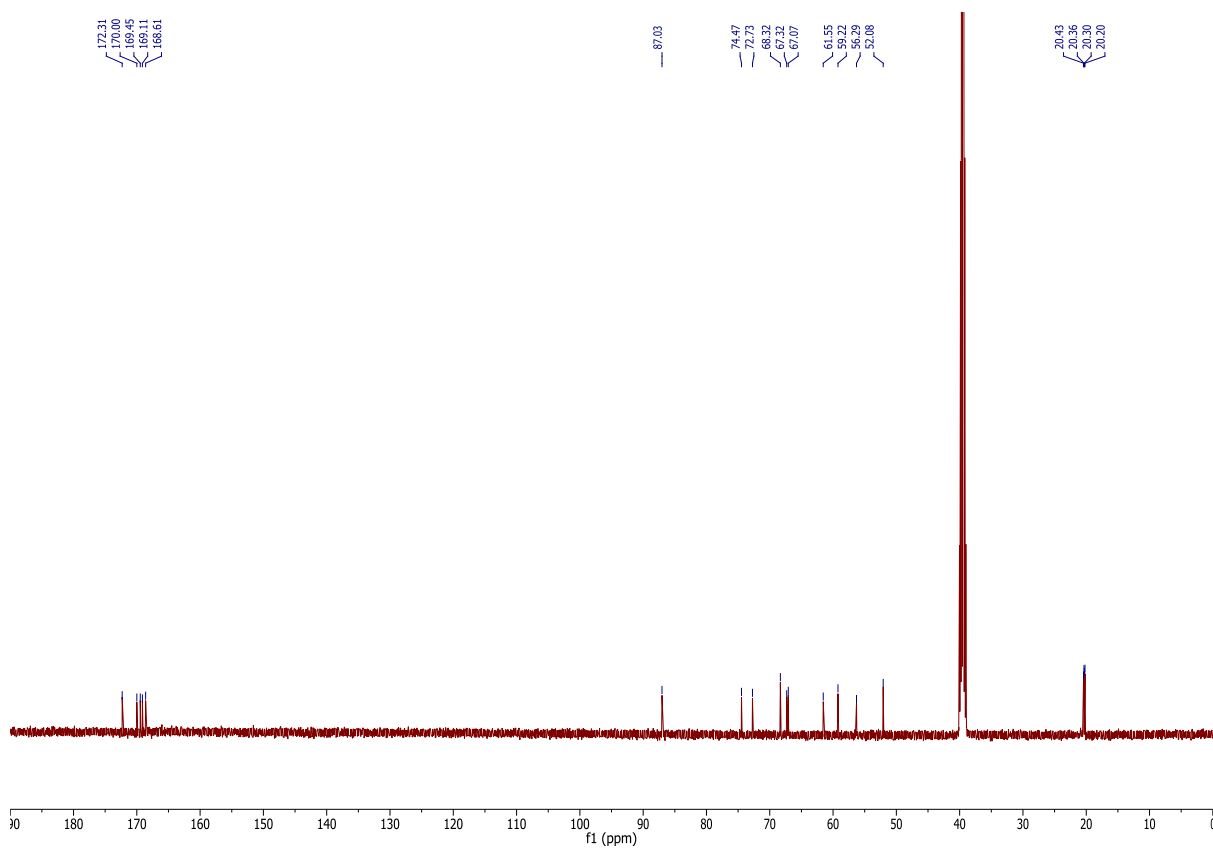

Compound **3g**

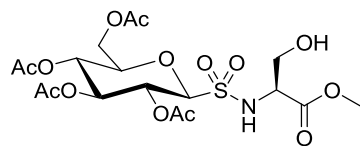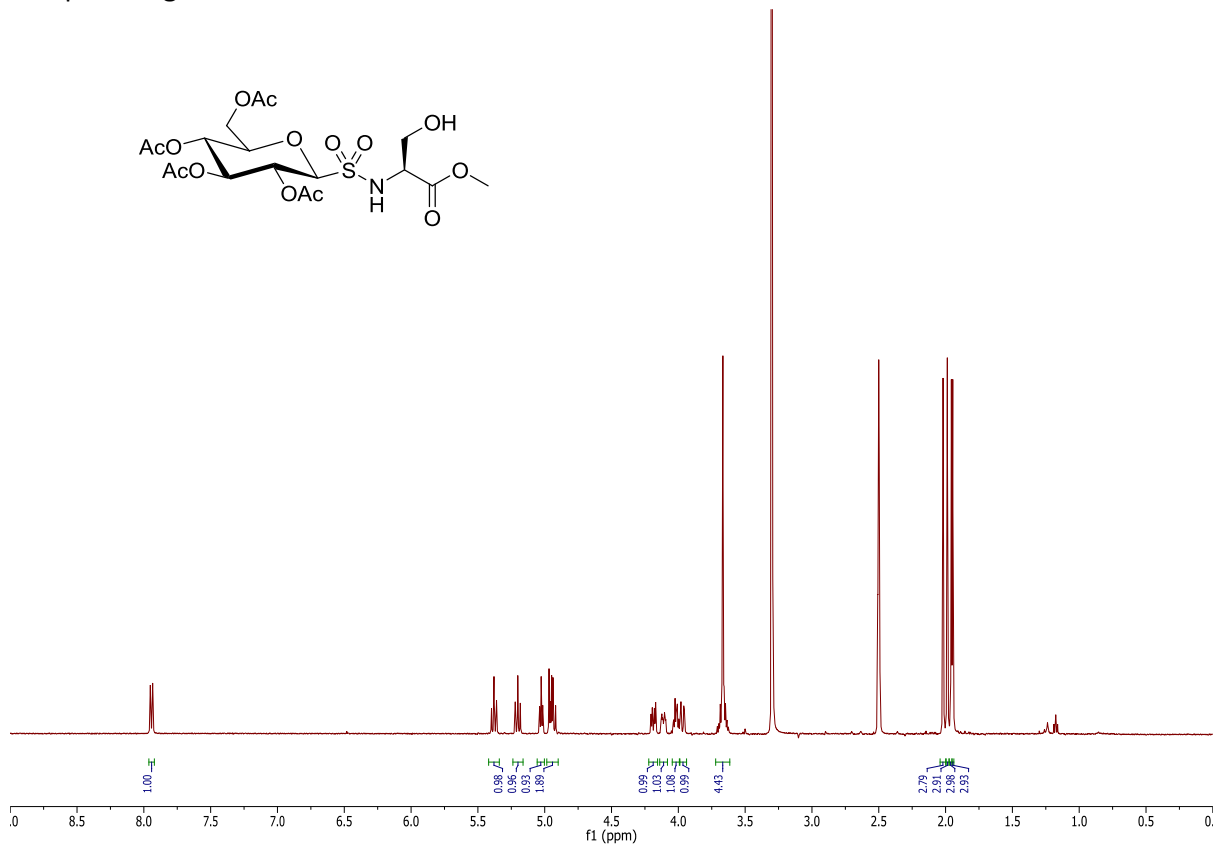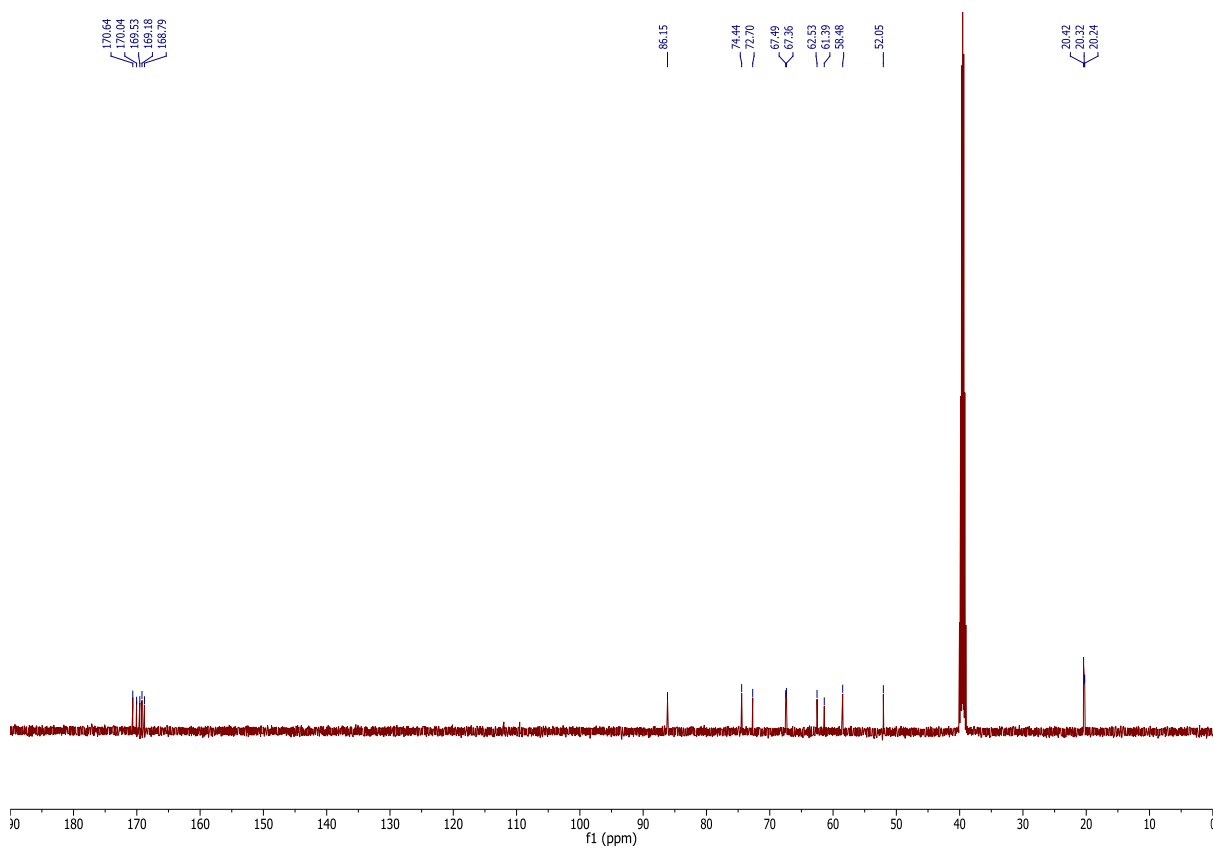

Compound 4a

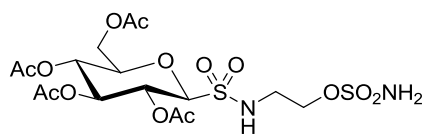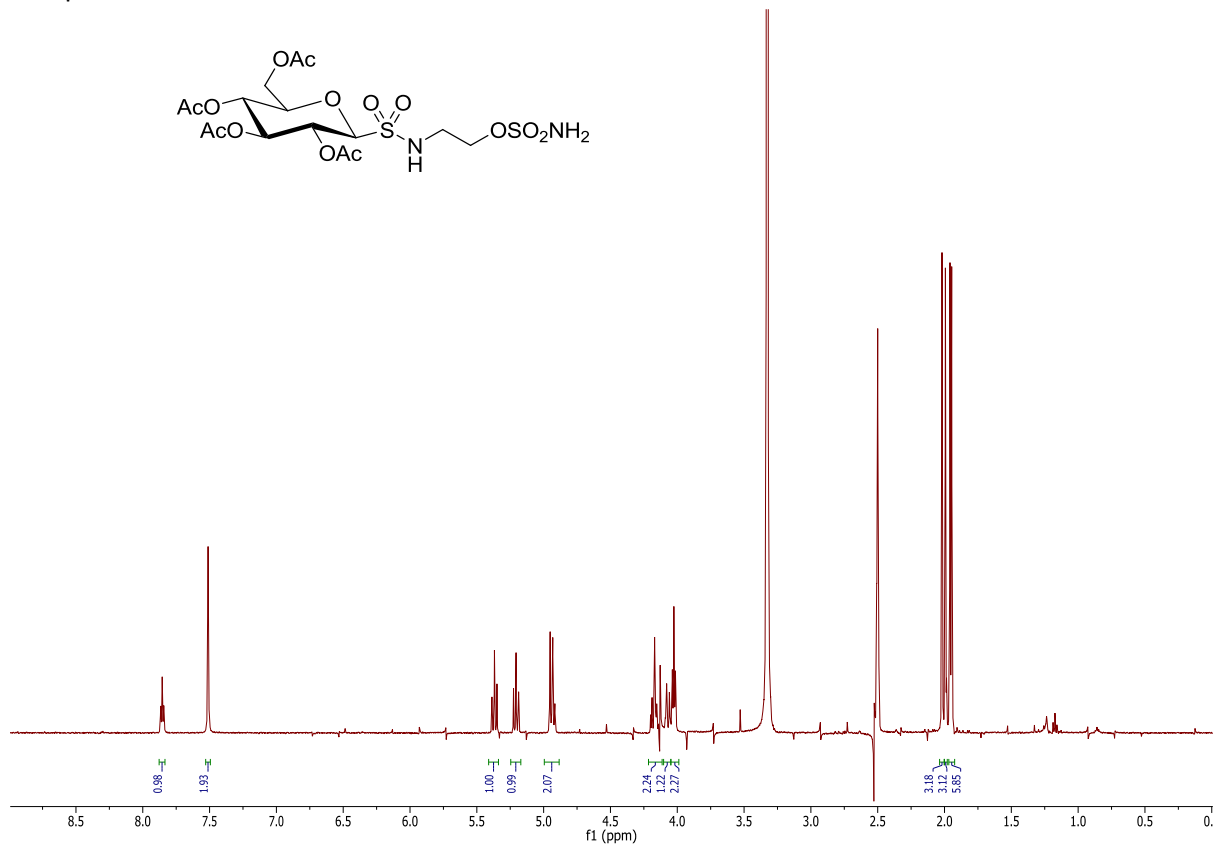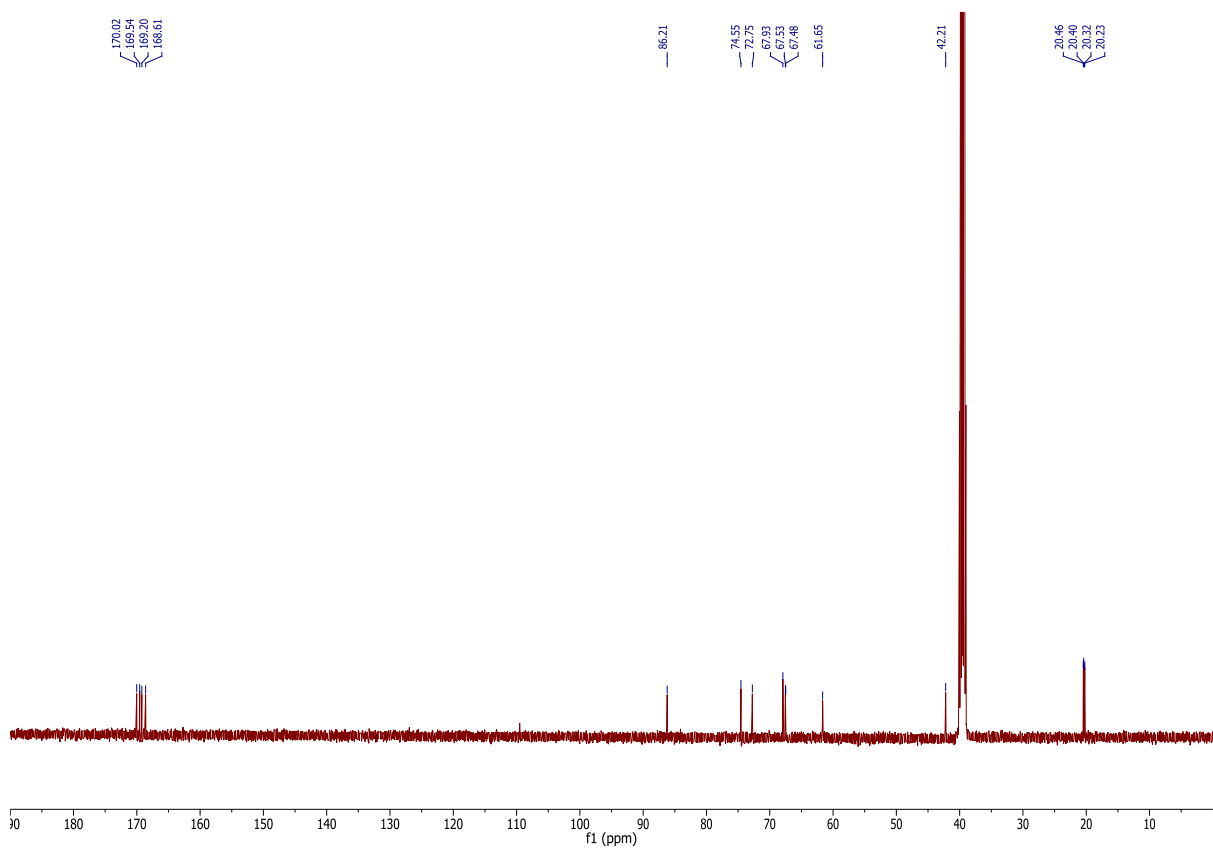

Compound **4b**

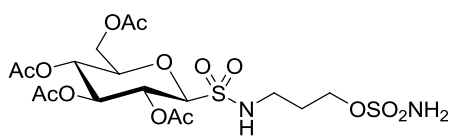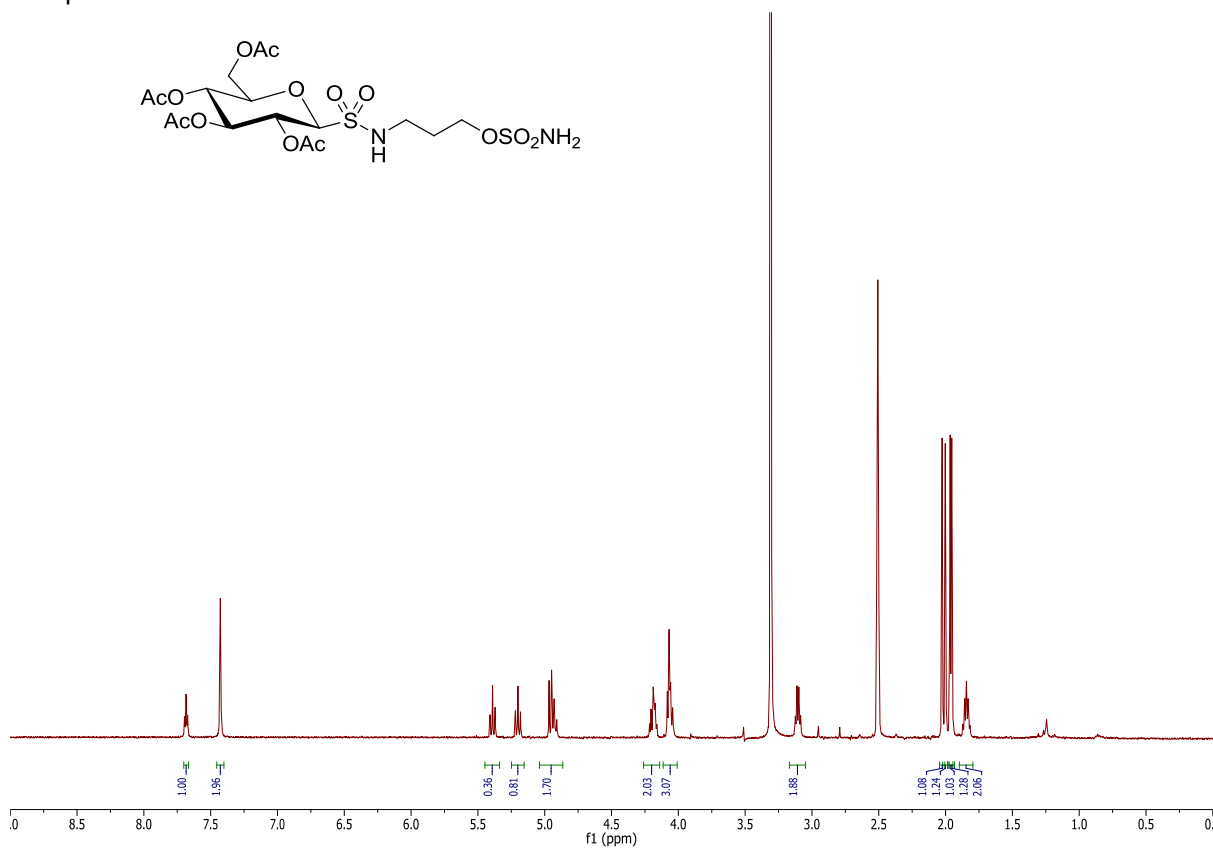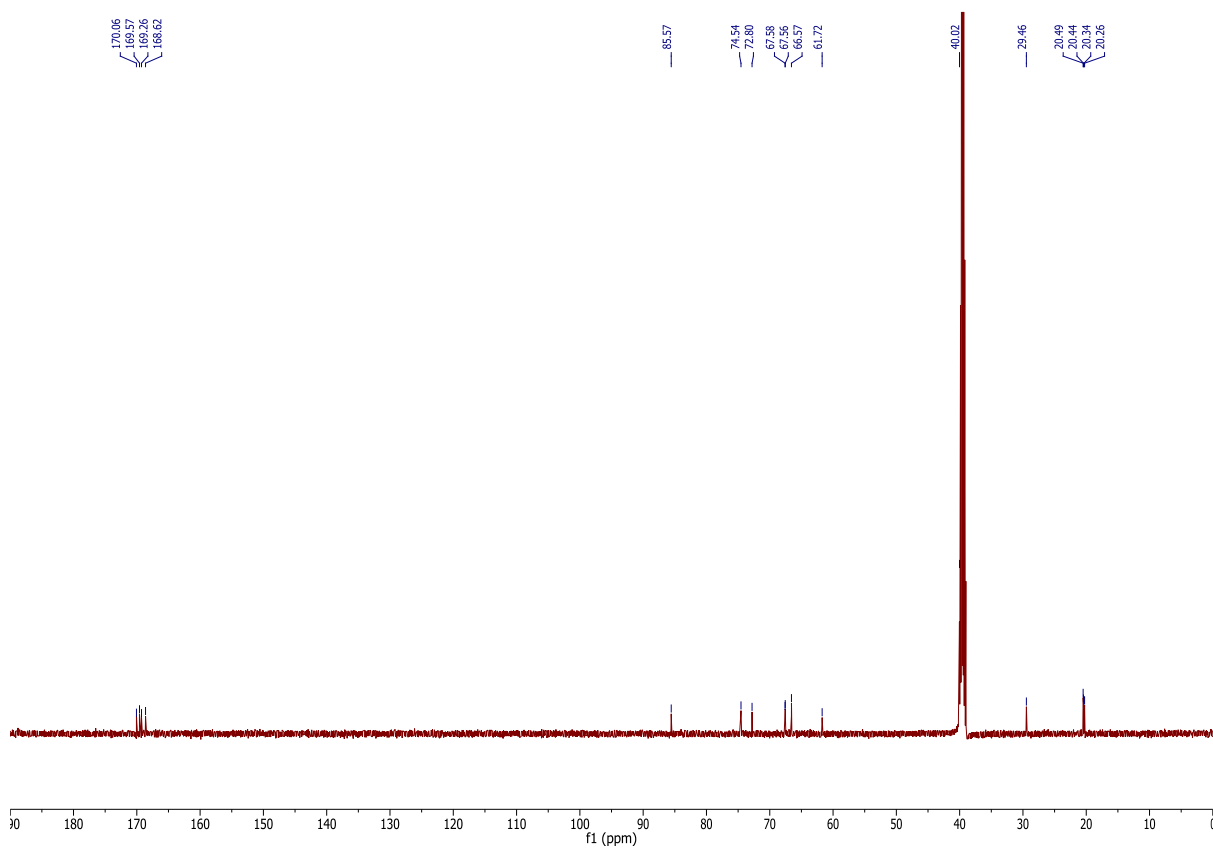

Compound 4c

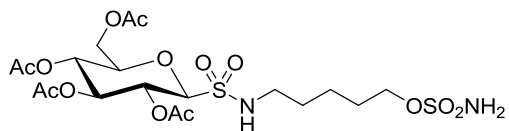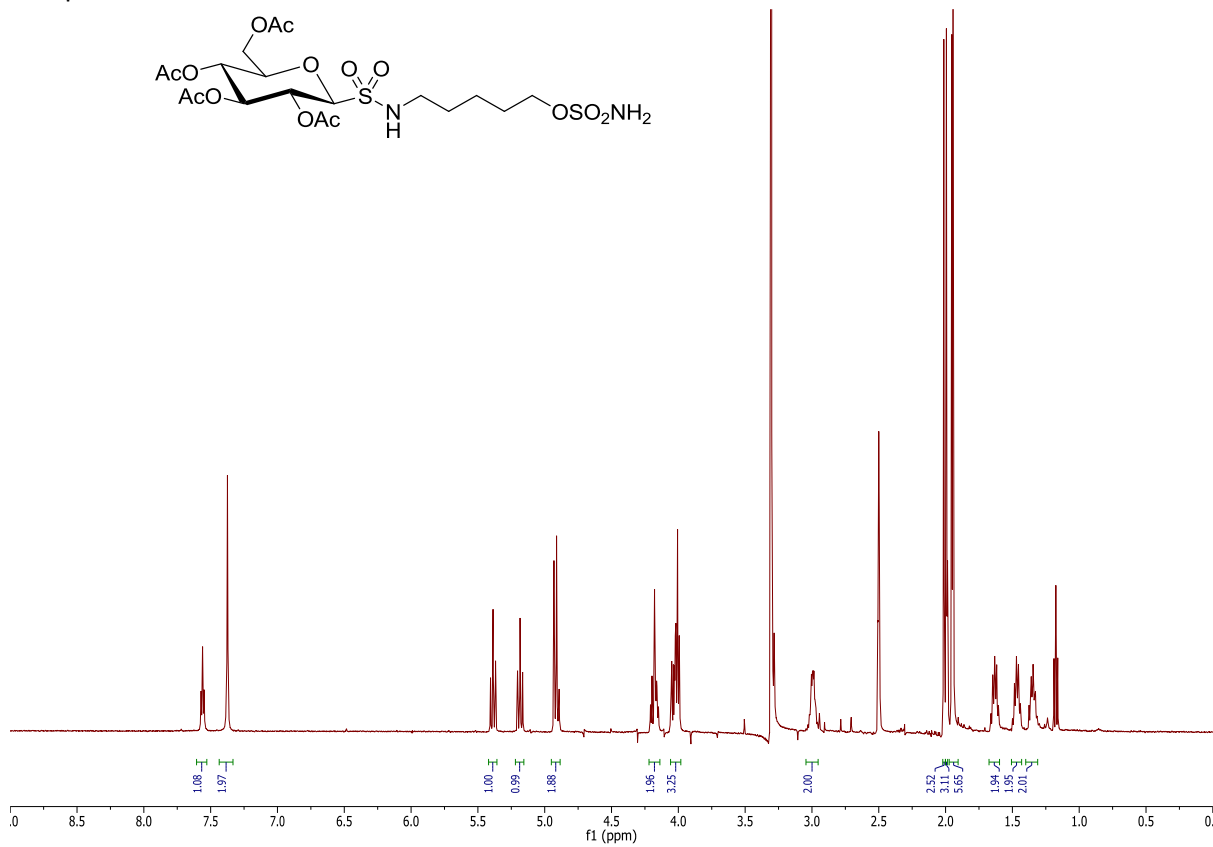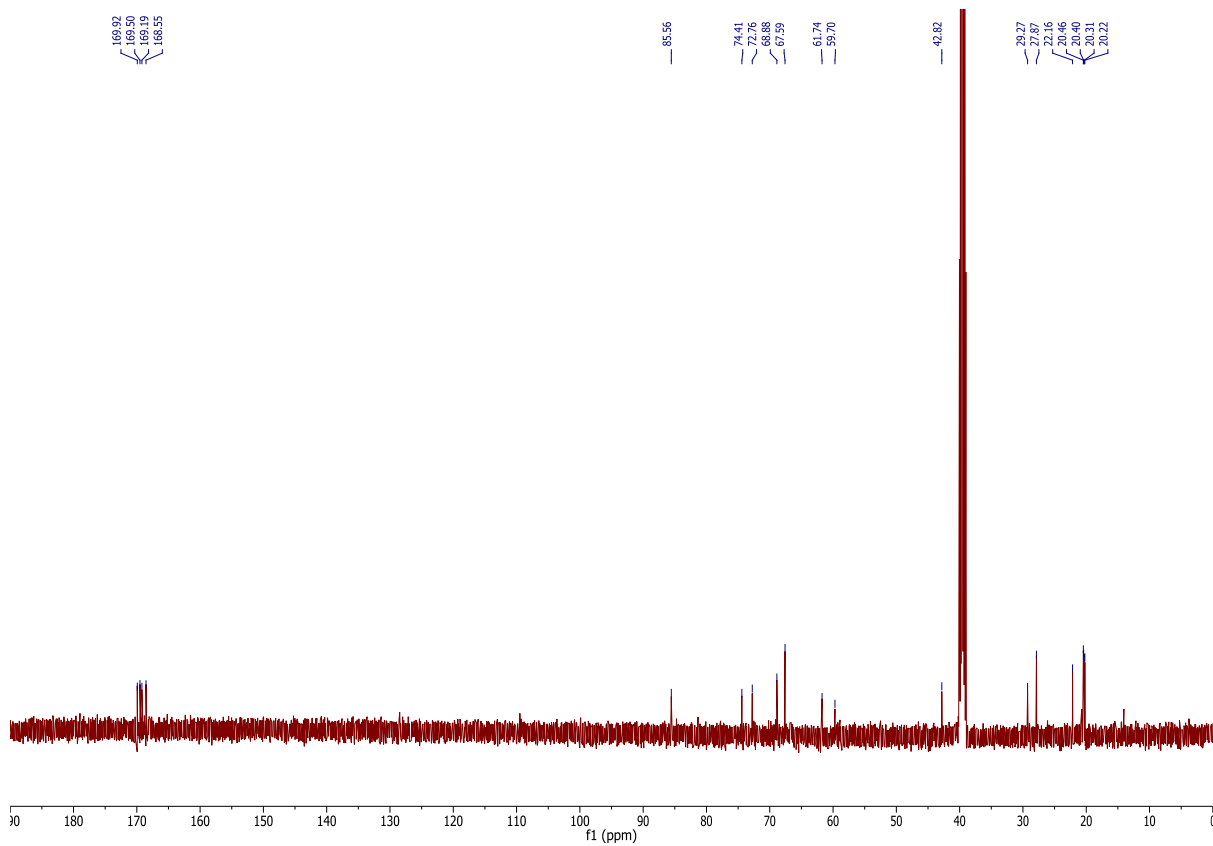

Compound **4d**

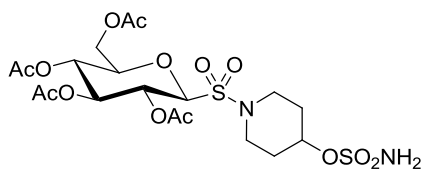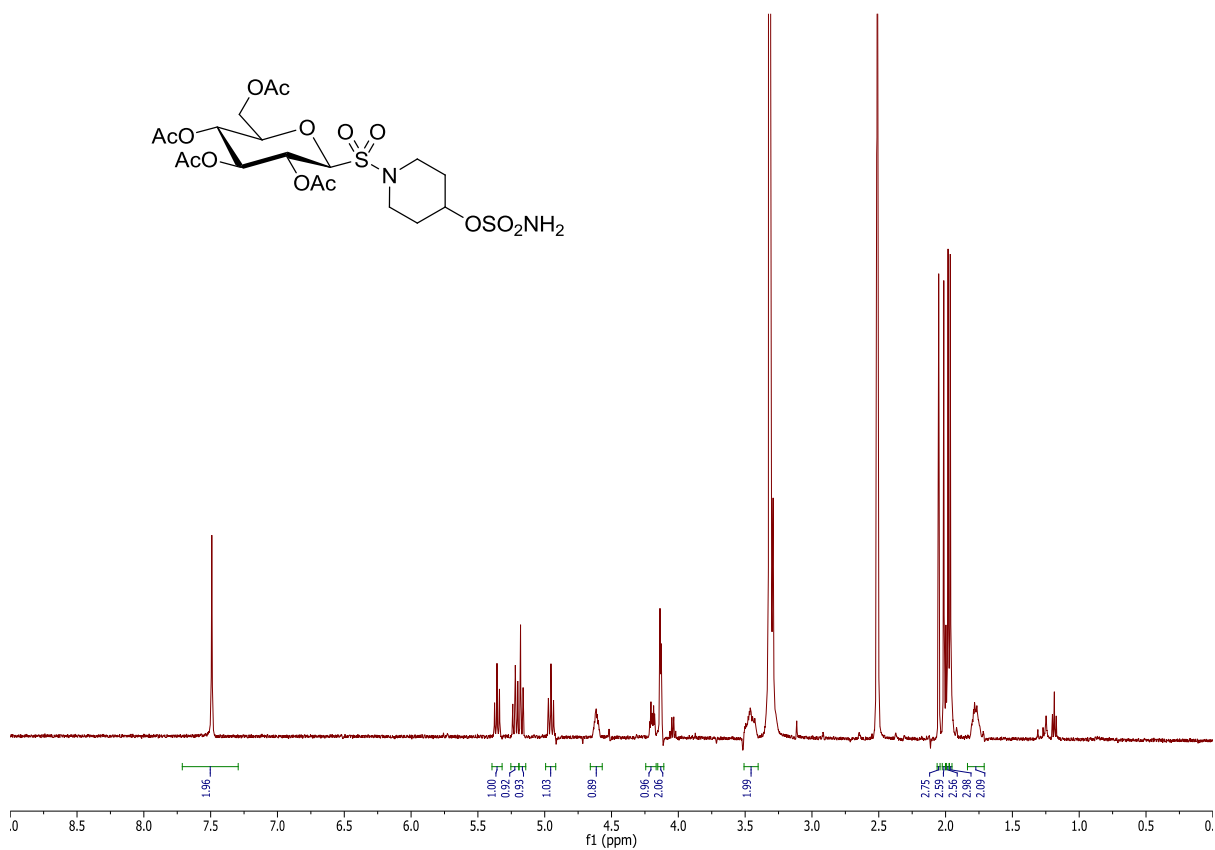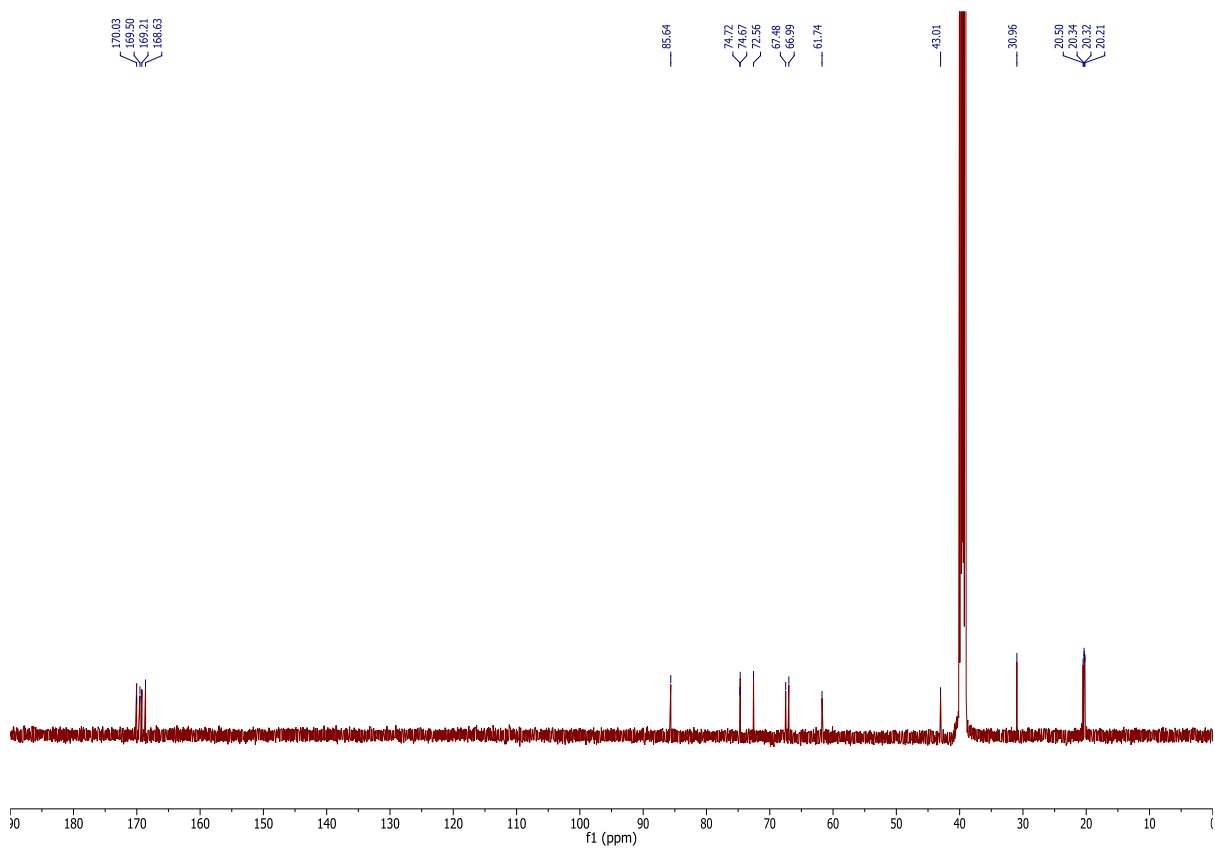

Compound 4e

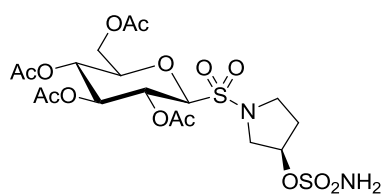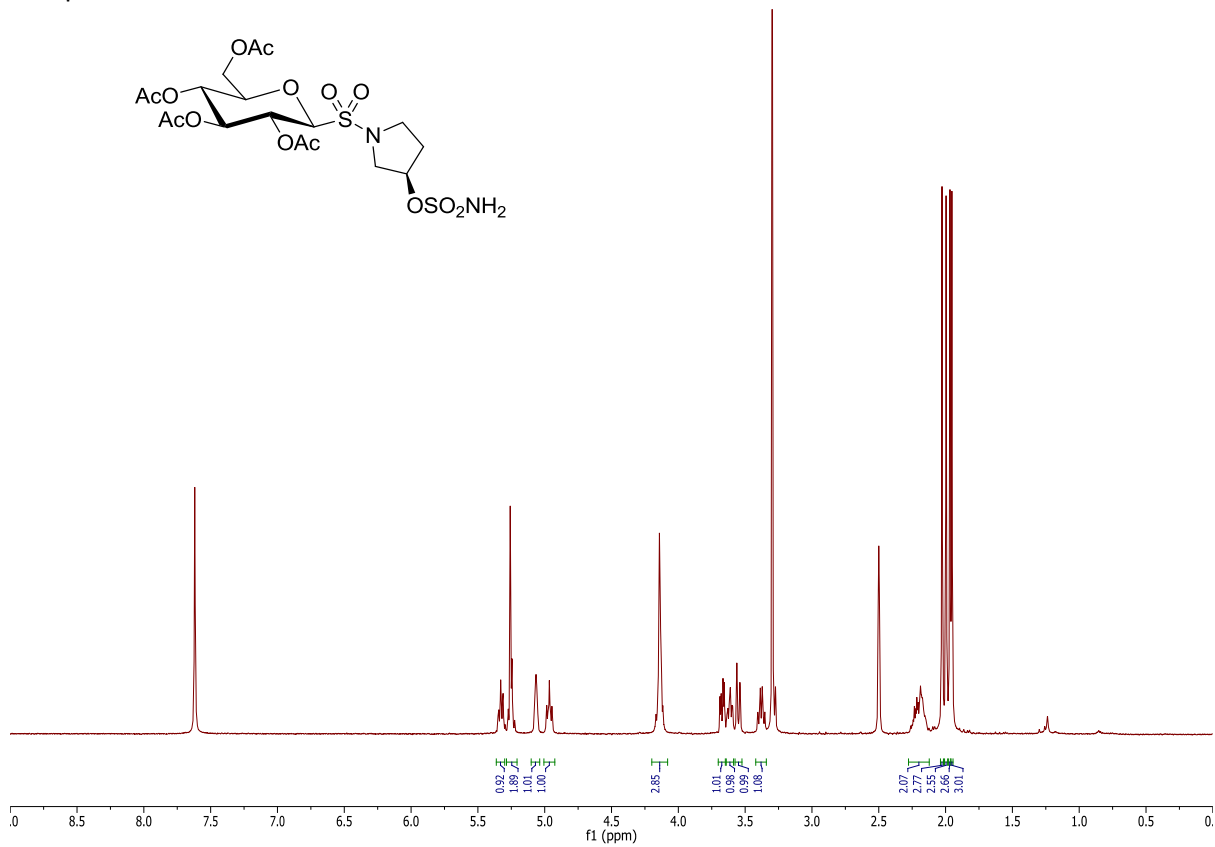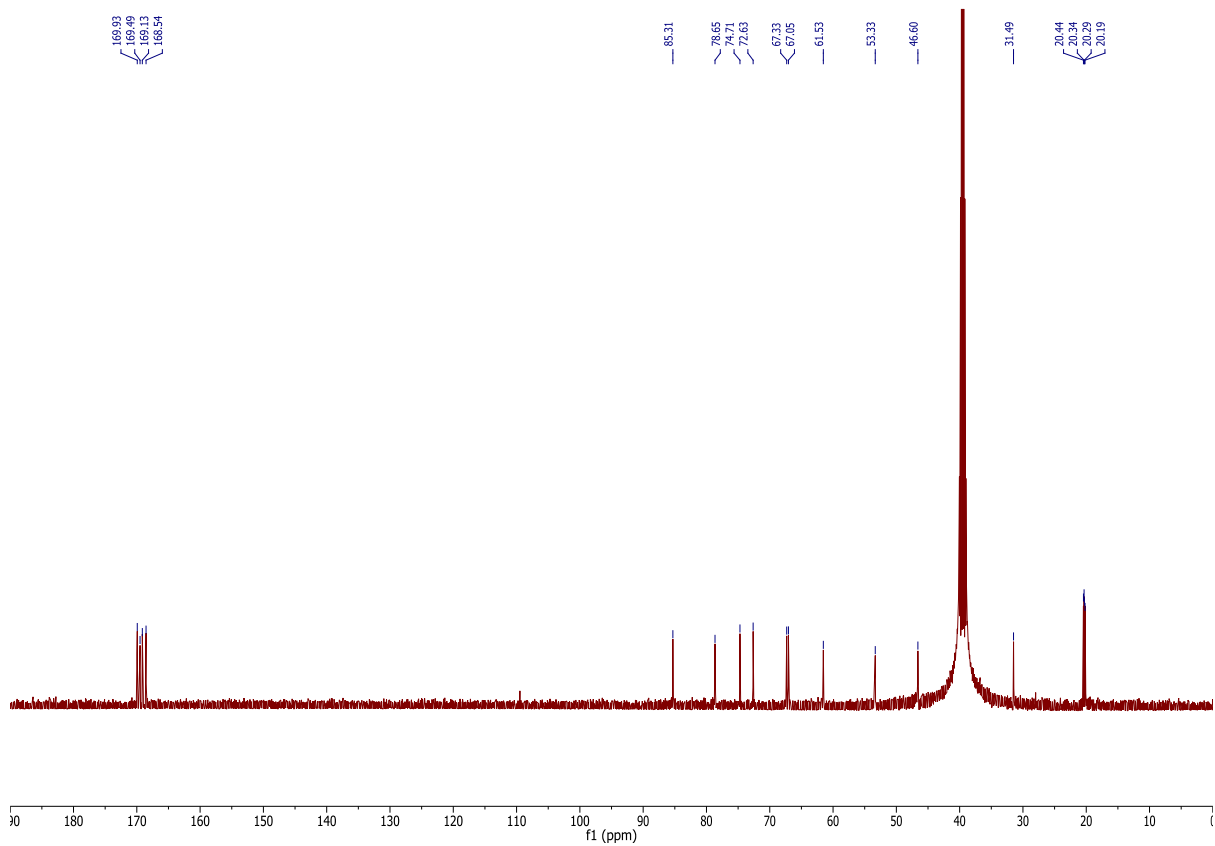

Compound **4f**

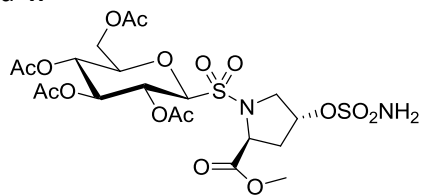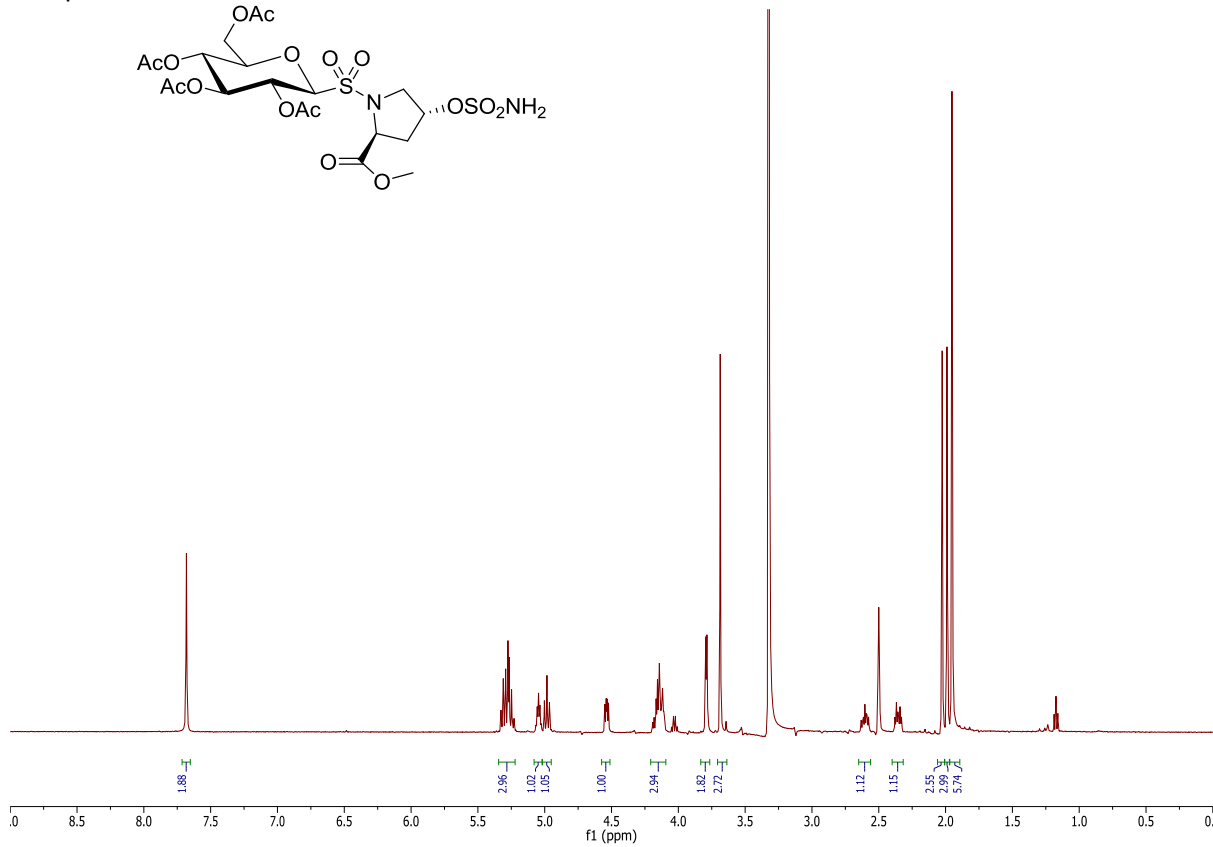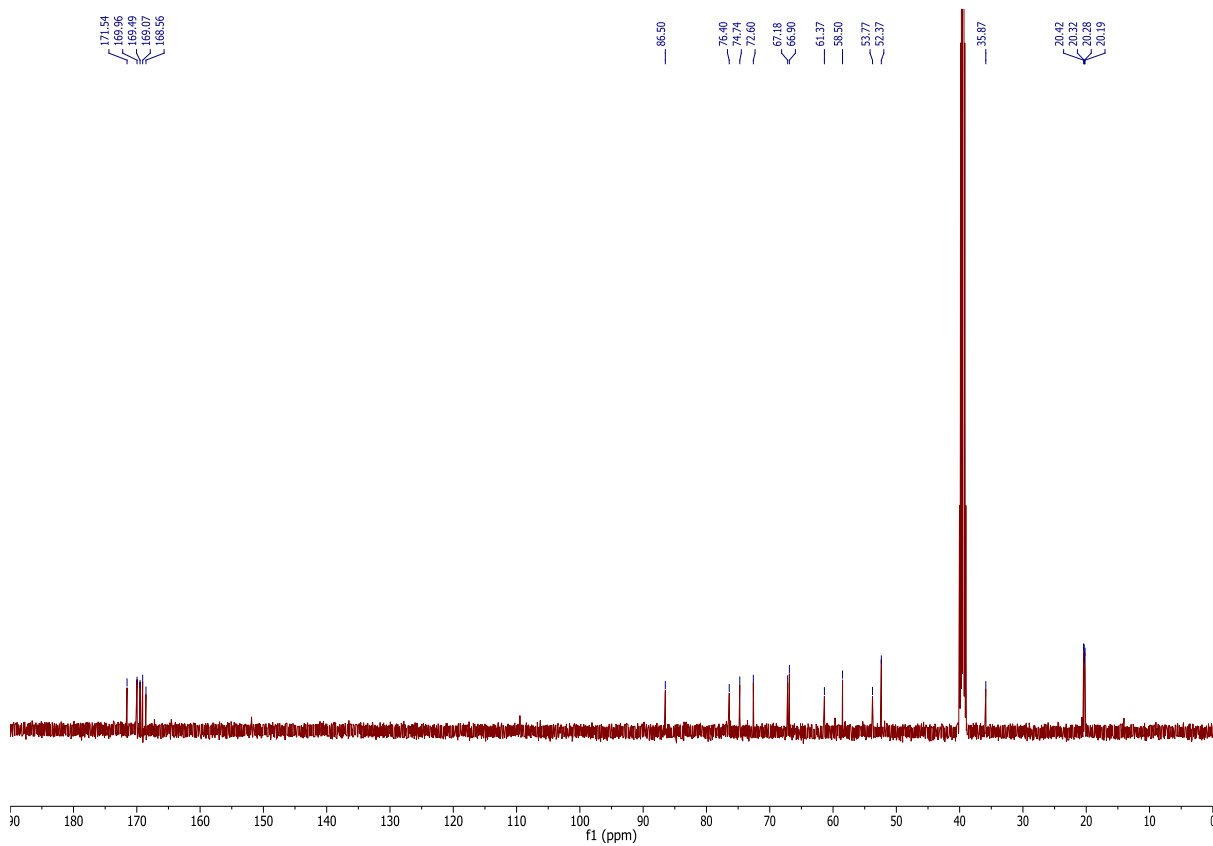



Compound **4g**

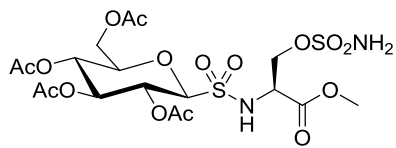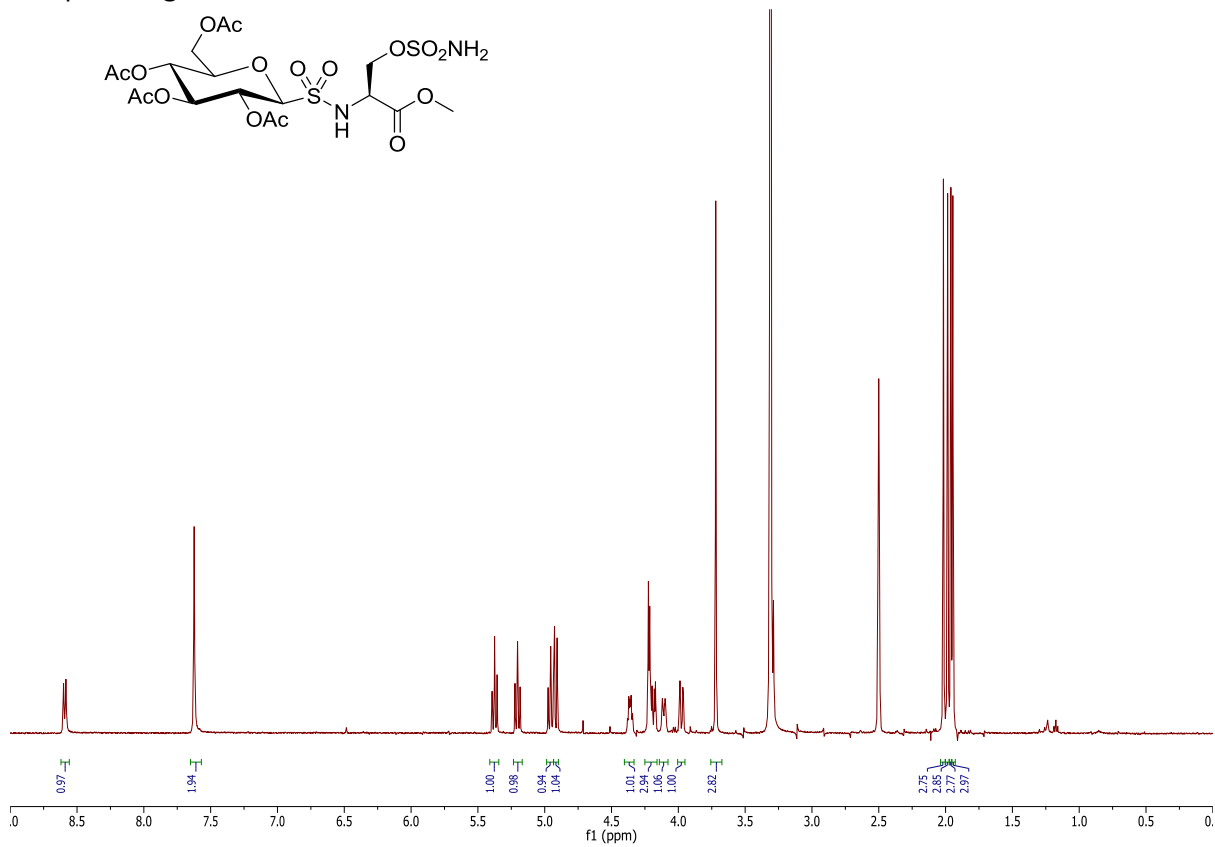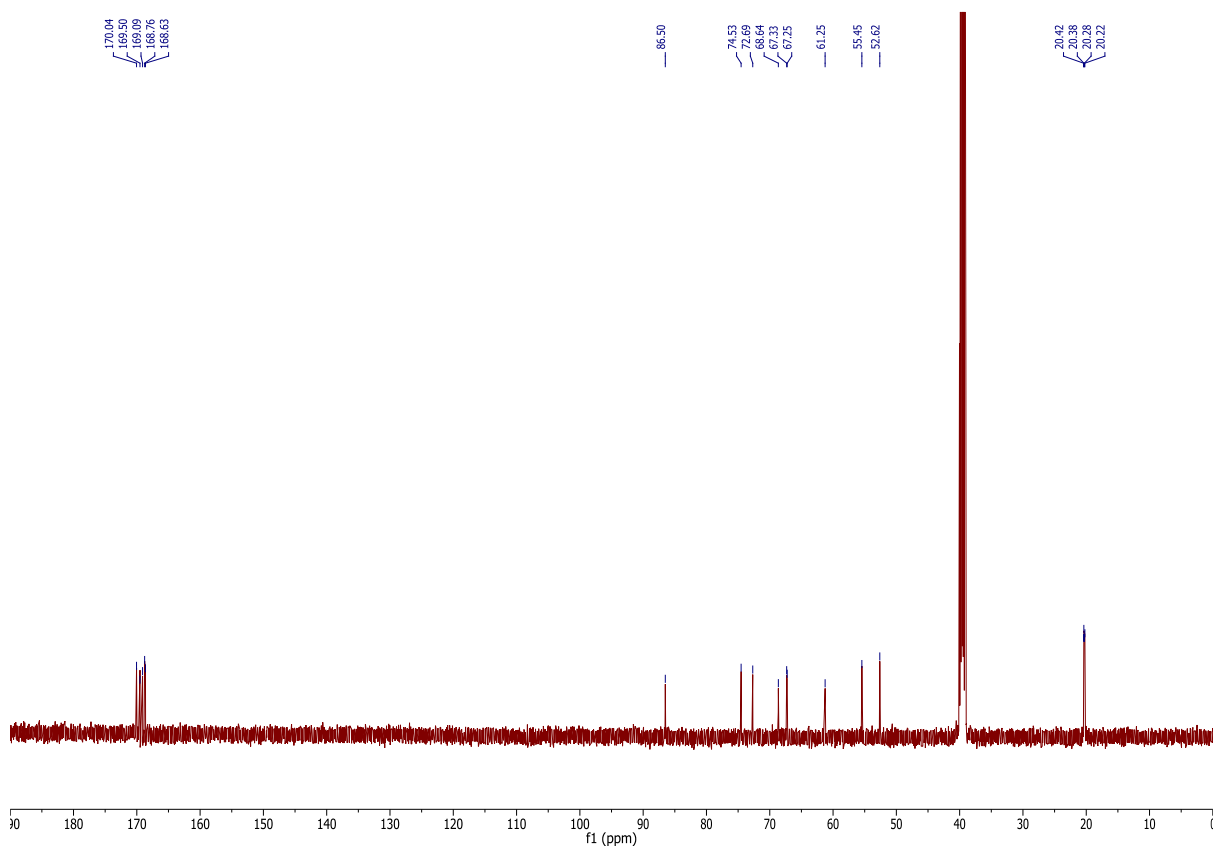

Compound 5b

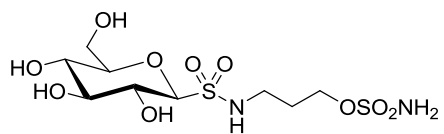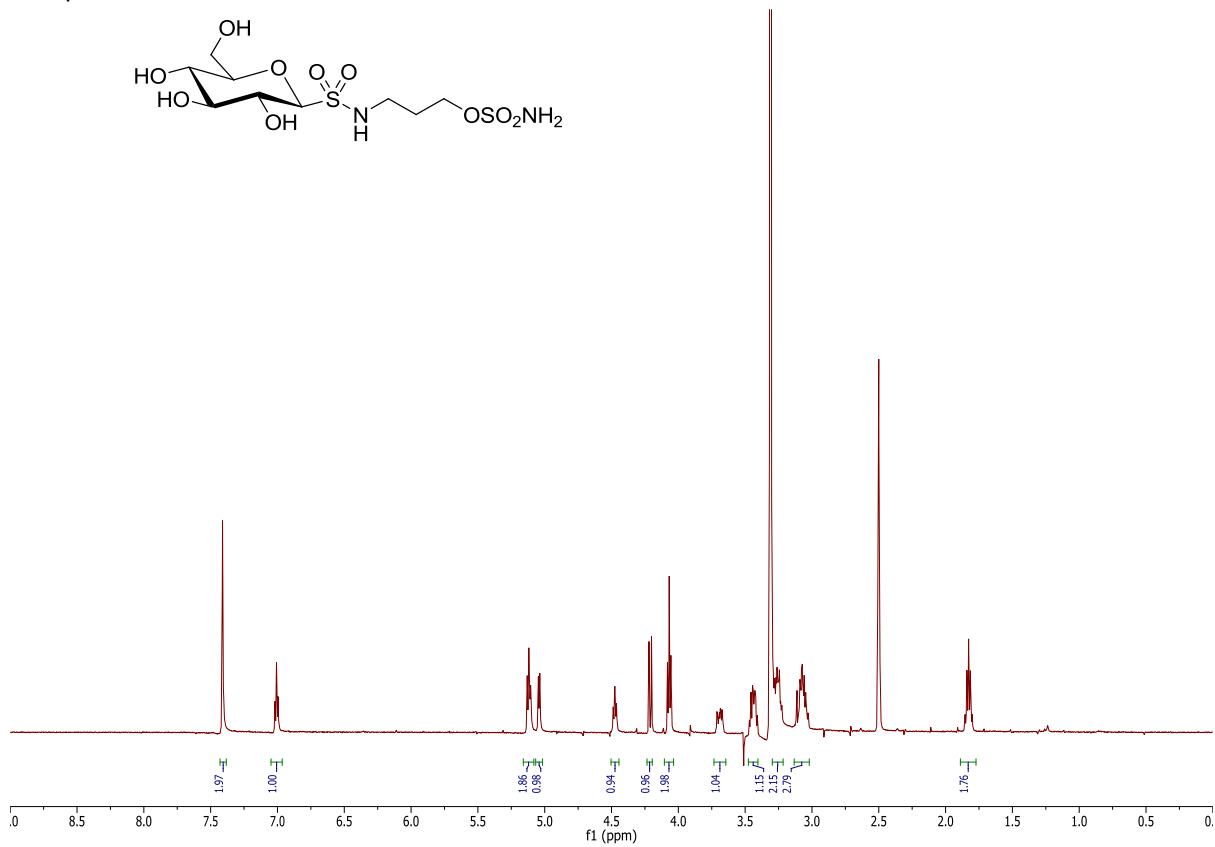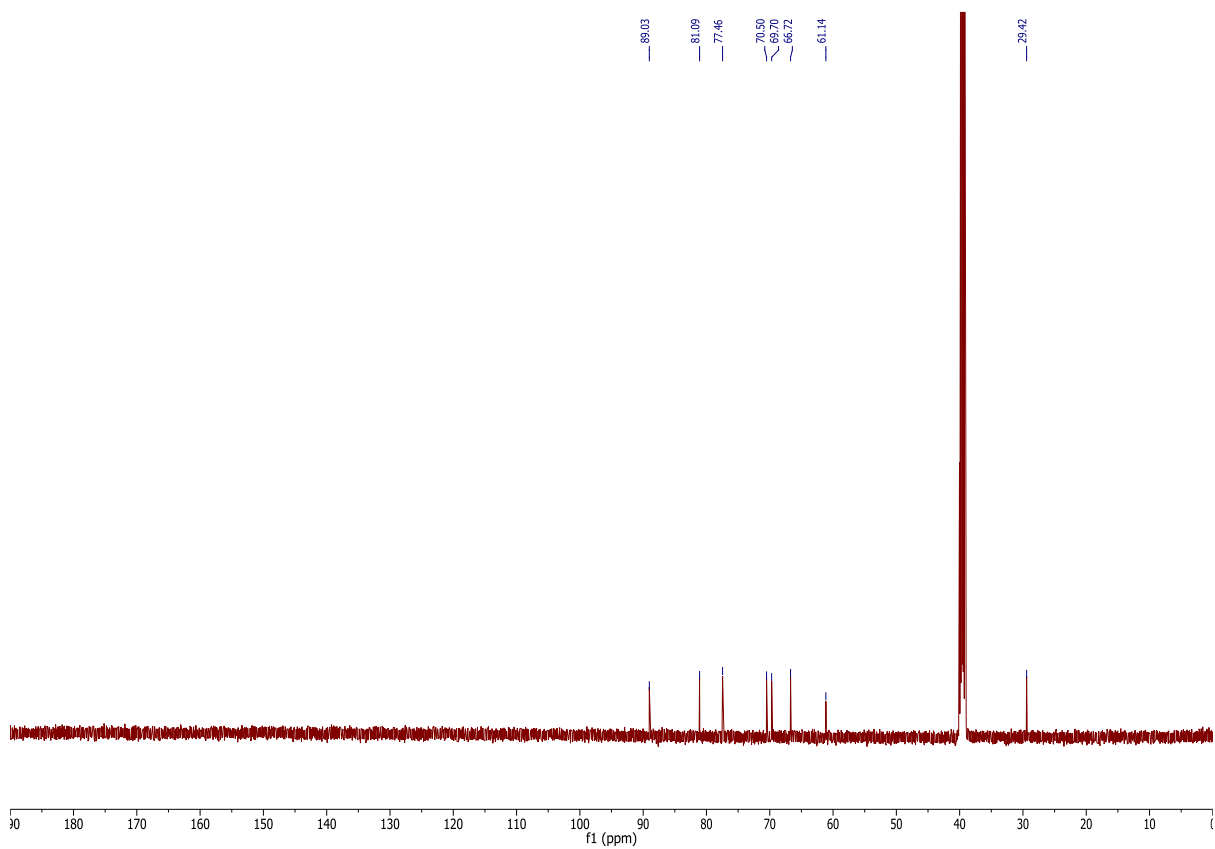

Compound 5c

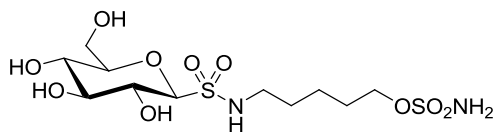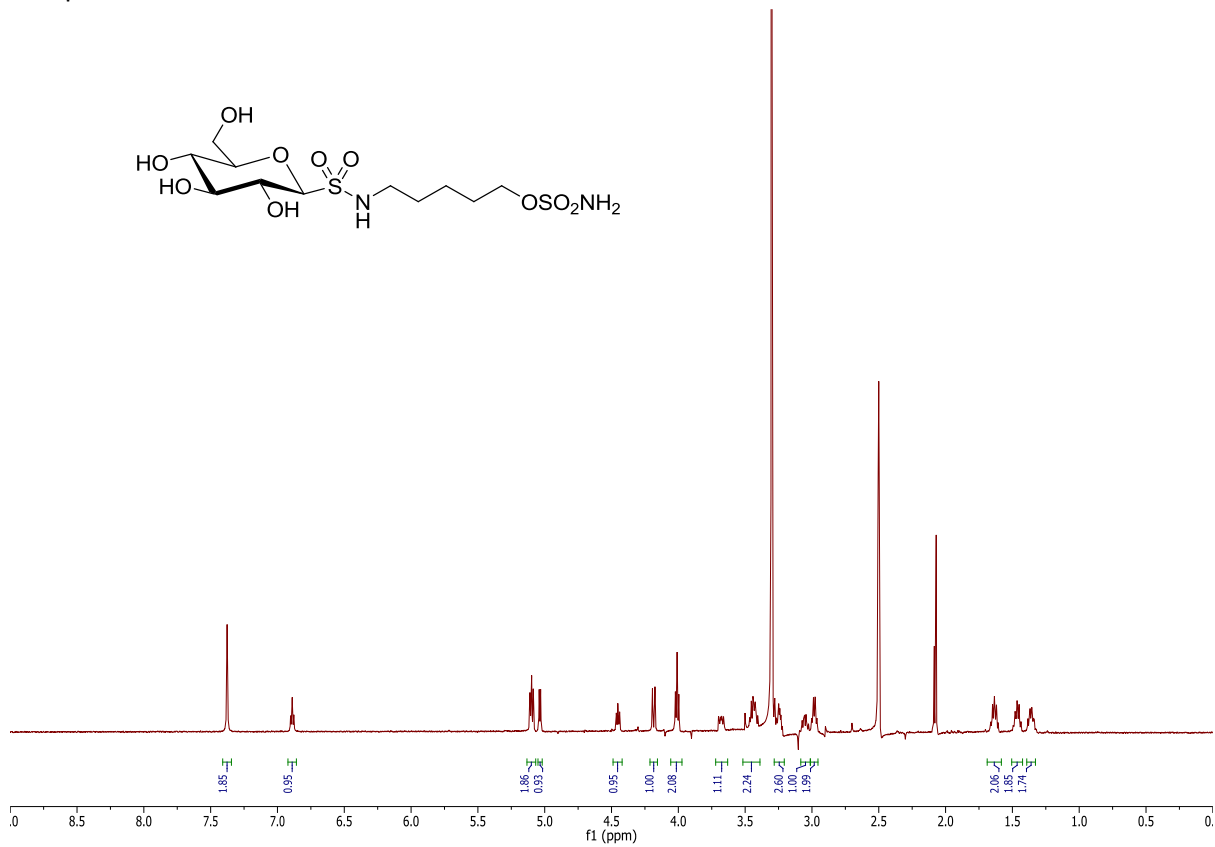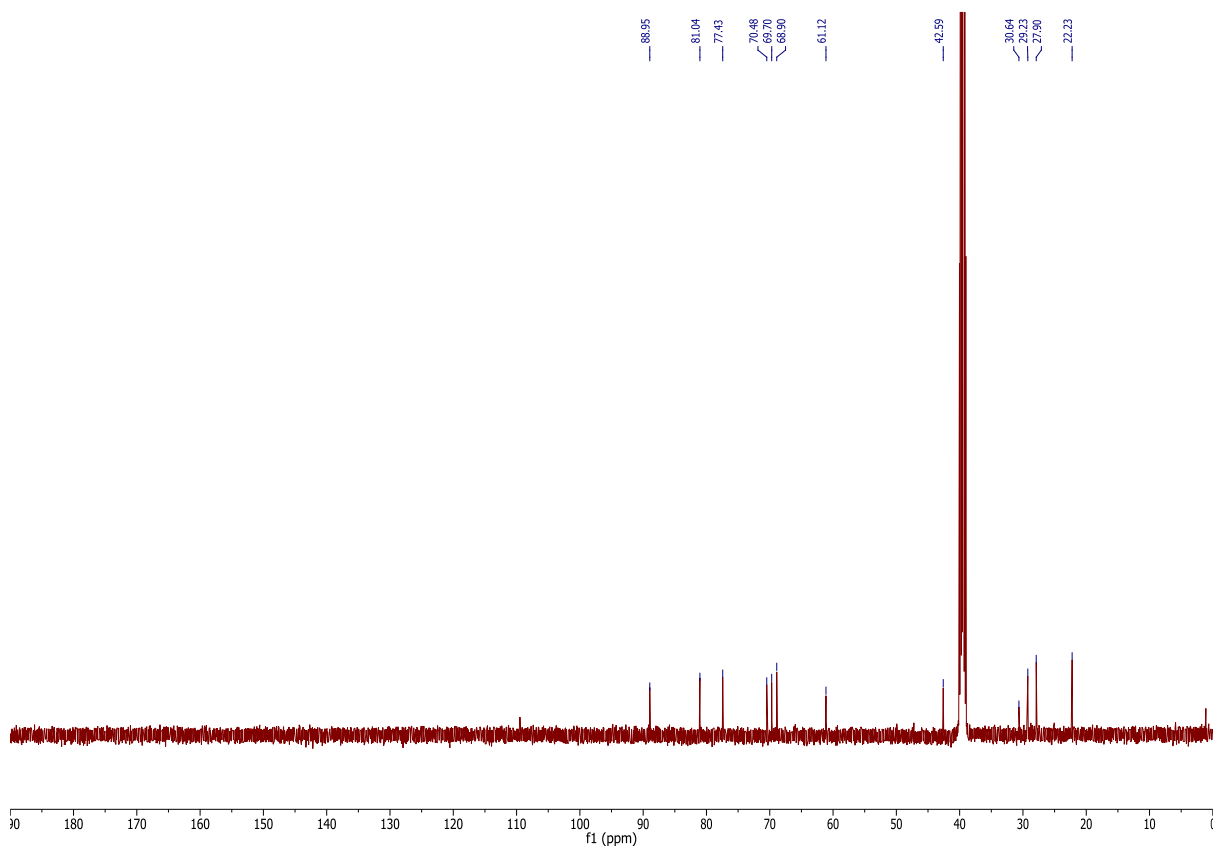

Compound 5d

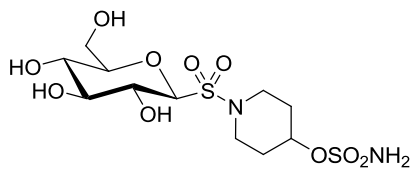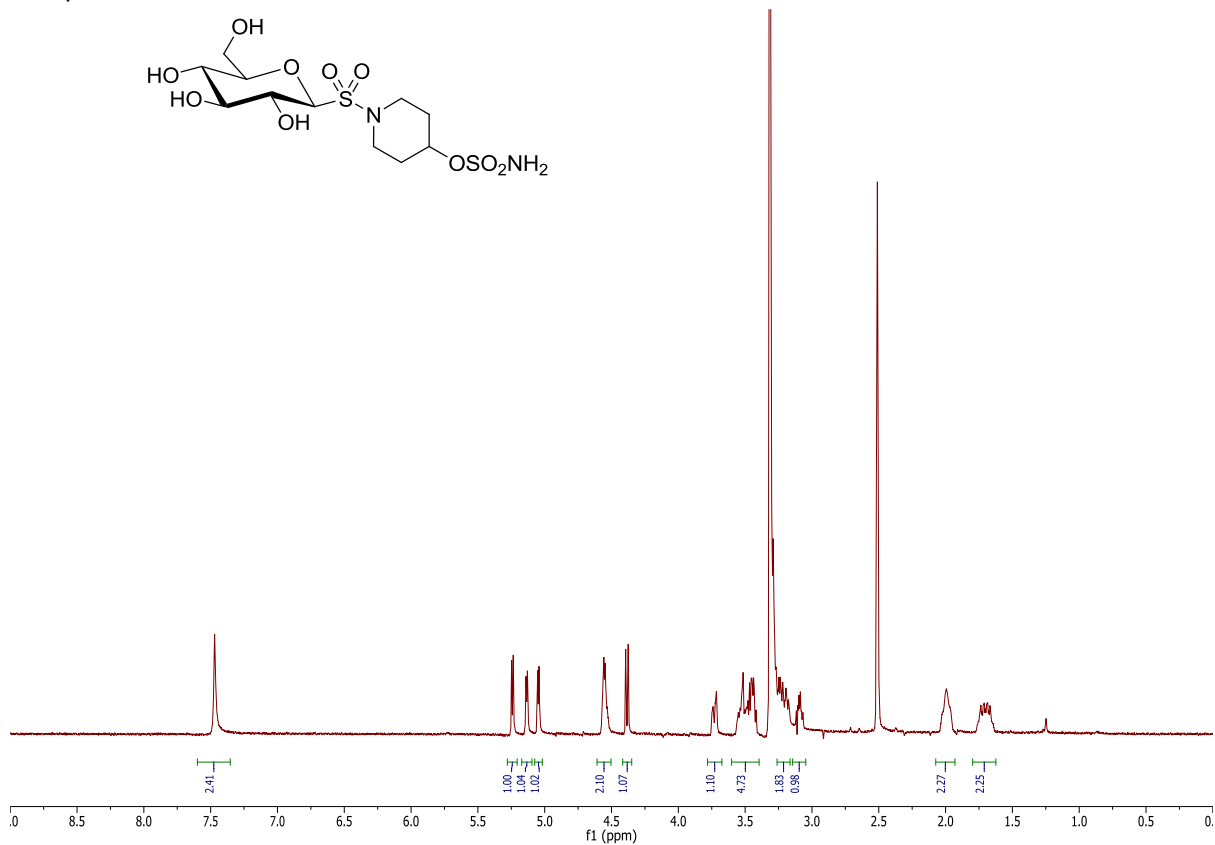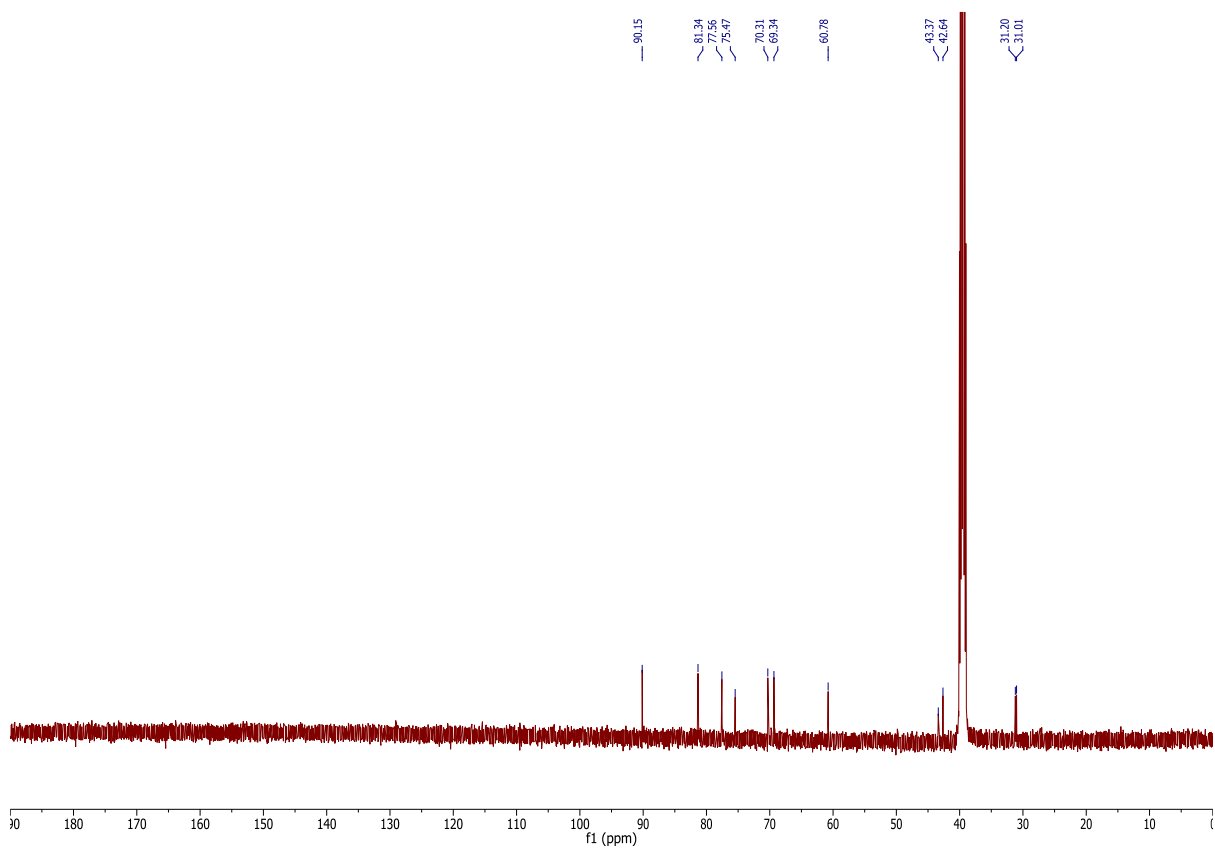

Compound 5e

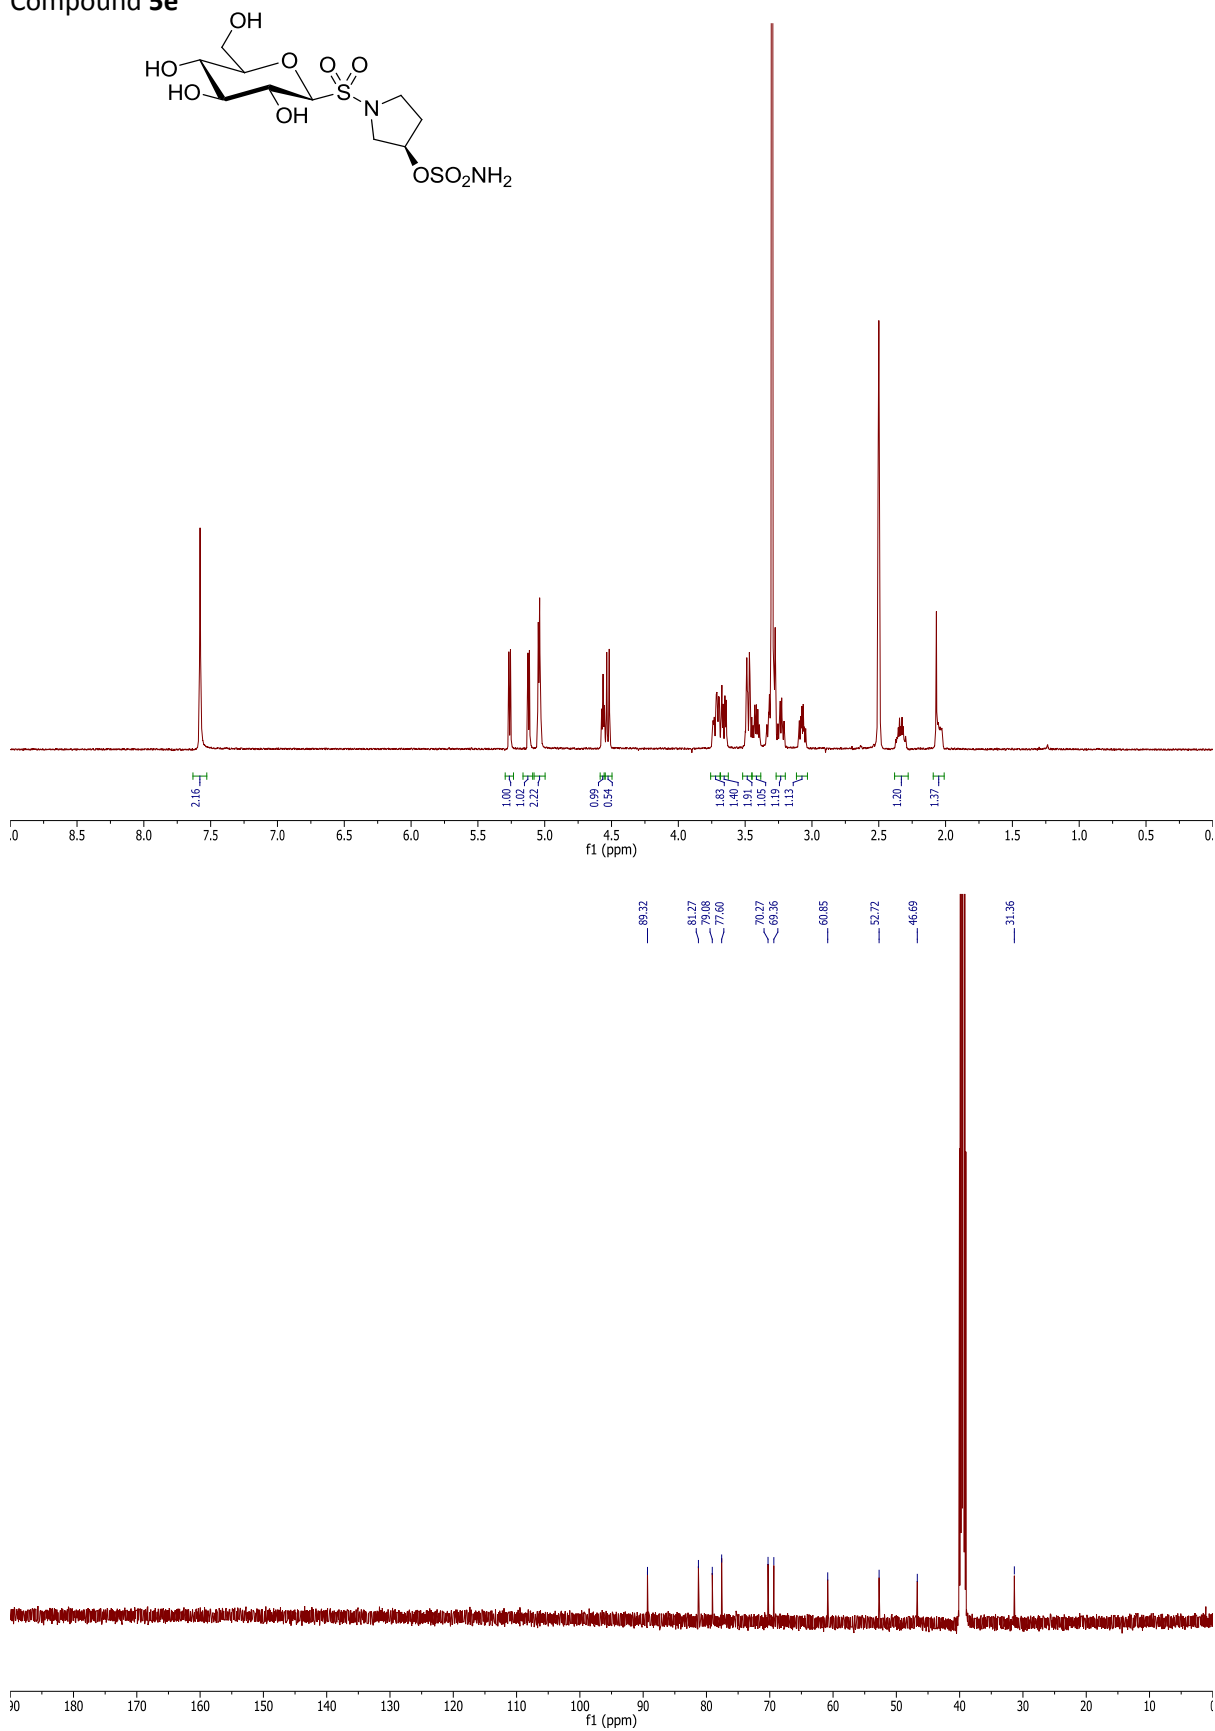

Supplement: jm5012935_si_001.pdf [file jm5012935_si_001.pdf]
